1 **A highly attenuated Vesiculovax vaccine rapidly protects nonhuman**  
2 **primates against lethal Marburg virus challenge**

3

4 Courtney Woolsey<sup>1,2</sup>, Robert W. Cross<sup>1,2</sup>, Krystle N. Agans<sup>1,2</sup>, Viktoriya Borisevich<sup>1,2</sup>,  
5 Daniel J. Deer<sup>1,2</sup>, Joan B. Geisbert<sup>1,2</sup>, Cheryl Gerardi<sup>3</sup>, Theresa E. Latham<sup>3</sup>, Karla A.  
6 Fenton<sup>1,2</sup>, Michael A. Egan<sup>4</sup>, John H. Eldridge<sup>4</sup>, Thomas W. Geisbert<sup>1,2\*</sup>, Demetrius  
7 Matassov<sup>3\*</sup>

8

9 **Short title: Vesiculovax vaccine rapidly protects against Marburg virus**

10

11 **Affiliations:**

12 <sup>1</sup>Department of Microbiology and Immunology, University of Texas Medical Branch,  
13 Galveston, TX 77555, USA; <sup>2</sup>Galveston National Laboratory, University of Texas Medical  
14 Branch, Galveston, TX 77555, USA; <sup>3</sup>Department of Viral Vaccine Development, Auro  
15 Vaccines, Pearl River, New York 10965, USA; <sup>4</sup>Department of Immunology, Auro  
16 Vaccines, Pearl River, New York 10965, USA.

17

18 \*To whom correspondence should be addressed:

19 [twgeisbe@utmb.edu](mailto:twgeisbe@utmb.edu)

20 [dmattasov@aurovaccines.com](mailto:dmattasov@aurovaccines.com)

21

22 **Keywords: Marburg virus, filovirus, rVSV, VSV, Vesiculovax, ring vaccination,**  
23 **Ervebo, Angola variant**

## 24 **Abstract**

25 **Background:** Marburg virus (MARV), an Ebola-like virus, remains an eminent threat  
26 to public health as demonstrated by its high associated mortality rate (23-90%) and recent  
27 emergence in West Africa for the first time. Although a recombinant vesicular stomatitis  
28 virus (rVSV)-based vaccine (Ervebo) is licensed for Ebola virus disease (EVD), no  
29 approved countermeasures exist against MARV. Results from clinical trials indicate  
30 Ervebo prevents EVD in 97.5-100% of vaccinees 10 days onwards post-immunization.

31

32 **Methodology/Findings:** Given the rapid immunogenicity of the Ervebo platform  
33 against EVD, we tested whether a similar, but highly attenuated, rVSV-based Vesiculovax  
34 vector expressing the glycoprotein (GP) of MARV (rVSV-N4CT1-MARV-GP) could  
35 provide swift protection against Marburg virus disease (MVD). Here, groups of  
36 cynomolgus monkeys were vaccinated 7, 5, or 3 days before exposure to a lethal dose of  
37 MARV (Angola variant). All subjects (100%) immunized one week prior to challenge  
38 survived; 80% and 20% of subjects survived when vaccinated 5- and 3-days pre-exposure,  
39 respectively. Lethality was associated with higher viral load and aberrant innate immunity  
40 signaling, whereas survival correlated with development of MARV GP-specific antibodies  
41 and early expression of NK cell-, B-cell-, and cytotoxic T-cell-related transcriptional  
42 signatures.

43

44 **Conclusions/Significance:** These results emphasize the utility of Vesiculovax  
45 vaccines for MVD outbreak management. The highly attenuated nature of rVSV-N4CT1

46 vaccines, which are clinically safe in humans, may be preferable to vaccines based on the  
47 same platform as Ervebo (rVSV “delta G” platform), which in some trial participants  
48 induced vaccine-related adverse events in association with viral replication including  
49 arthralgia/arthritis, dermatitis, and cutaneous vasculitis.

50

## 51 **Author Summary**

52 Marburg virus (MARV) is one of the deadliest viruses known to man. One of the most  
53 effective vaccines against this pathogen uses a recombinant vesicular stomatitis virus  
54 (rVSV) platform to express MARV glycoprotein (GP) immunogen. As rVSV-based  
55 vaccines may be used as medical interventions to mitigate or prevent outbreaks of MARV,  
56 defining the time window needed to elicit protection is vital. Here, a rVSV vector  
57 expressing MARV glycoprotein (rVSV-N4CT1-MARV-GP) fully protected nonhuman  
58 primates from lethality and disease when given as soon as 1 week prior to exposure. At 5-  
59 and 3-days pre-exposure, partial protection (80% and 20% survival, respectively) was  
60 achieved. Vaccination with rVSV-N4CT1-MARV-GP appears to “jump-start” the immune  
61 system to allow sufficient time for MARV-specific adaptive responses to form. This fast-  
62 acting vaccine is based on a similar platform as Ervebo, the only FDA- and EU-approved  
63 vaccine for preventing Ebola virus infection. The rVSV-N4CT1-MARV-GP vaccine  
64 features additional attenuations in the rVSV backbone that may contribute to a more  
65 acceptable safety profile in vaccinees, as Ervebo in some recipients induced vaccine-  
66 related adverse events including rashes and joint pain.

## 67 **Introduction**

68 The genera *Marburgvirus* and *Ebolavirus* are cousins in the family *Filoviridae* that cause  
69 a similar life-threatening hemorrhagic disease in humans and nonhuman primates (NHPs)  
70 [1]. Due to their high risk to national security and public health, viruses in both genera are  
71 classified as World Health Organization (WHO) High Priority Category A pathogens [2]  
72 and US Centers for Disease Control (CDC) Tier 1 select agents [3]. While *Ebolavirus*  
73 contains six genetically distinct species, *Marburgvirus* contains a single species: *Marburg*  
74 *marburgvirus* (MARV).

75 In 2004-2005, MARV was responsible for one of the deadliest filovirus outbreaks  
76 to date. The virus emerged in the Uige province of Angola resulting in 252 confirmed cases  
77 and 227 deaths (~ 90% case fatality rate) [4]. Outbreaks of MARV are primarily restricted  
78 to eastern and southern Africa, which largely overlaps with the geographic distribution of  
79 its reservoir species, the Egyptian fruit bat (*Rousettus aegyptiacus*) [5]. While MARV  
80 outbreaks have so far been limited and sporadic, field studies in Uganda indicate that 2–  
81 3% of Rousette bats are actively infected with Marburgviruses at any given time [6].  
82 Biannual seasonal pulses contribute to a ~ 10% increase in MARV infections in juvenile  
83 Rousette bats that coincide with spillover into human populations [6]. This high rate of  
84 infection along with the extensive seroprevalence in Rousette bats underscore the  
85 underappreciated threat that MARV poses to public health. Marburgviruses have also  
86 recently emerged in previously non-endemic regions. On August 6<sup>th</sup>, 2021, the first known  
87 case of Marburg virus disease (MVD) in West Africa was reported to the World Health  
88 Organization [7]. The case originated in a villager from southwestern Guinea, not far from  
89 the Sierra Leonean and Liberian borders. Prior to the outbreak, surveillance in the region

90 revealed evidence of filoviruses circulating in nearby Sierra Leone, with active MARV  
91 infection in approximately 2.5% of Rousette bats [8]. Virus sequences obtained from  
92 Rousette bats in this area were most genetically similar to human isolates identified during  
93 the deadly MARV-Angola outbreak (2005), as well as bat isolates in Gabon and the  
94 Democratic Republic of Congo (DRC) (2006–2009). This evidence highlights the  
95 importance of pathogen surveillance in these regions and stresses the need for medical  
96 countermeasures against MVD as spillover events will likely continue to occur.

97         While substantial progress has been made towards the development of vaccines for  
98 one ebolavirus species, *Zaire ebolavirus* (EBOV), no licensed MVD vaccines or  
99 therapeutics are currently available. Ervebo® is the only vaccine approved by both the US  
100 Food and Drug Administration (FDA) and European Medicines Agency  
101 (<https://www.ema.europa.eu/en/medicines/human/EPAR/ervebo>) and is recommended by  
102 the WHO and US Advisory Committee on Immunization Practices (ACIP) for the  
103 prevention of Ebola virus disease (EVD) [9, 10]. The vaccine is comprised of a live-  
104 attenuated, recombinant vesicular stomatitis virus (rVSV) vector that expresses EBOV  
105 glycoprotein (GP) immunogen instead of its native glycoprotein (G). Administration of  
106 Ervebo to contacts (and contacts of contacts) of confirmed cases in a ring vaccination trial  
107 during the 2013-2016 West Africa and 2018-2020 DRC EBOV outbreaks prevented  
108 disease in 97.5-100% of those immunized within 10 days onwards [11, 12]. These data  
109 demonstrate the ability of Ervebo to serve as a fast-acting vaccine. To protect exposed  
110 individuals and reduce community transmission, a similar vaccination strategy could be  
111 implemented in the event of a MARV outbreak.

112           Preclinical studies have demonstrated the use of rVSV vectors to serve as  
113 preventative vaccines and postexposure treatments against MVD in guinea pigs and  
114 nonhuman primates (NHPs) [13-21]. NHPs serve as the most stringent animal model for  
115 testing medical countermeasures and are considered the “gold standard” for recapitulating  
116 human manifestations of MVD including coagulopathies [22]. When administered ~ 1  
117 month before challenge, a single dose of a rVSV vaccine expressing MARV GP fully  
118 protected NHPs against a 1000 PFU lethal challenge of various MARV variants [16, 18,  
119 20]. Immunity with an rVSV vector was also durable with 100% protection against a lethal  
120 MARV exposure 14 months post-vaccination [23]. Moreover, all NHPs survived when the  
121 vaccine was administered 20-30 minutes post MARV (Musoke variant) exposure at the  
122 same challenge dose [15]. However, treatment with a rVSV vector at 20-30 minutes after  
123 infection failed to fully defend macaques against challenge with the Angola variant of  
124 MARV (only 25% survival) [14]. *In vitro* studies demonstrate the Angola variant enters  
125 host cells via C-type lectin receptors more efficiently than MARV-Musoke, which may  
126 contribute to its increased pathogenicity [24]. MARV-Angola also yields a more rapid  
127 disease course and a more pronounced pathology in outbred guinea pigs [25] and in NHPs  
128 [26], suggesting the Angola variant sets a high bar for MVD vaccines and therapeutics in  
129 terms of conferring protection.

130           While preclinical studies have demonstrated the ability of rVSV-based vaccines to  
131 rapidly combat Marburgviruses including the Angola variant [13, 14], the exact  
132 prophylactic window remains undefined. Recently, Marzi et al. reported that a “delta G”  
133 rVSV-based vaccine (rVSV $\Delta$ G-MARV-GP-Angola) similar to Ervebo fully protected  
134 NHPs when vaccinated at 7 or 14 days prior to exposure [27]. Partial protection (75%) was

135 observed when NHPs were vaccinated 3 days before exposure. Correspondingly,  
136 postexposure treatment with a similar vaccine at 20-30 minutes after infection was shown  
137 to be 89% effective in protecting NHPs against a low 50 PFU dose of MARV-Angola [13].  
138 Although these results are promising, safety studies with the delta G Ervebo vector have  
139 shown undesirable vaccine-related adverse events in humans including prolonged and  
140 recurrent arthritis symptoms, maculopapular or vesicular dermatitis, cutaneous vasculitis,  
141 and viral shedding [28, 29]. While Ervebo was deemed safe for human use and none of  
142 these adverse events were classified as contraindications, a highly effective but less  
143 reactogenic next generation vaccine would likely be preferred for widespread  
144 immunization.

145       Highly attenuated rVSV-based Vesiculovax vaccines induce low reactogenicity in  
146 humans and exhibit fast-acting potential in NHPs [13, 14, 17, 30]. When NHPs were  
147 administered rVSV-N2CT1-MARV-GP or rVSV-N4CT1-MARV-GP Vesiculovax  
148 vectors 20-30 minutes after a low dose MARV-Angola exposure (50 PFU), survival was  
149 80% and 60%, respectively [13, 14]. Therefore, Vesiculovax vaccines provide comparable  
150 protection as delta G vaccines. Unlike delta G rVSV vectors, Vesiculovax vectors express  
151 target antigen from the first position to increase immunogen expression [17]. The native G  
152 is preserved but contains a cytoplasmic tail truncation that interferes with particle  
153 maturation due to decreased interaction of G and the nucleoprotein (N) at the nucleocapsid  
154 core [31]. The rVSV-N4CT1-MARV-GP vaccine is a highly attenuated vector containing  
155 a rVSV N4 translocation (N2 vectors contain an N2 translocation). Shuffling the rVSV N  
156 from the first to the fourth position markedly diminishes the intracellular abundance of this



157 protein by virtue of its increased distance from the 3' transcription promoter [32]. These  
158 modifications enable robust attenuation of the vector while retaining high immunogenicity.

159 In this study, we tested the ability of the highly attenuated rVSV-N4CT1-MARV-  
160 GP vector to serve as a rapid-acting vaccine for reactive immunization during MVD  
161 outbreaks. NHPs were vaccinated at 7, 5, or 3 days before exposure to define the minimum  
162 time needed between vaccination and challenge to elicit protective immunity against  
163 MARV-Angola. Samples were collected over the course of the study to examine NHPs for  
164 clinical signs of disease and to characterize the immune response to vaccination after  
165 challenge.

166

## 167 **Methods**

### 168 **Generation of rVSV vaccine vectors**

169 The rVSV-N4CT1-MARV-GP and rVSVN4CT1-HIVgag vaccine vectors used in this  
170 study were recovered from infectious clones as described previously [14, 17]. An  
171 expression cassette encoding the full-length MARV-Angola GP (accession number:  
172 DQ447653) or HIV gag protein, respectively, was cloned into a plasmid containing the  
173 full-length VSV genome. This plasmid encodes for a VSV N1 to N4 gene translocation  
174 and VSV G CT1 truncation; the MARV-Angola GP or HIV gag gene is expressed from  
175 the first genomic position to maximize GP antigen expression. Vectors were then recovered  
176 from Vero cells following electroporation with the resulting plasmids along with VSV  
177 helper plasmids. The rescued virus was plaque purified and amplified to produce virus seed  
178 stocks. Vaccine vectors were purified and concentrated for *in vivo* experiments. Before

179 proceeding to *in vivo* studies in NHPs, the vector genomes were completely sequenced to  
180 verify the fidelity of the open reading frames (ORFs) for all genes.

181

## 182 **Challenge virus**

183 The MARV-Angola seed stock originates from the serum of a fatal patient (8-month-old  
184 female; isolate 200501379) during the 2004–2005 Uige, Angola outbreak (DQ: 447653.1).

185 The p2 challenge material was created by passaging the original isolate 200501379 twice  
186 onto Vero E6 cells (titer  $1.5 \times 10^7$  PFU/mL). Stocks were certified free of endotoxin (< 0.5  
187 EU/mL) and mycoplasma contamination.

188

## 189 **Ethics Statement**

190 Animal studies were conducted in compliance with the Animal Welfare Act and other  
191 federal statutes and regulations relating to animals and experiments involving animals. All  
192 experiments adhered to principles stated in the eighth edition of the “Guide for the Care  
193 and Use of Laboratory Animals” (National Research Council, 2011). The Galveston  
194 National Laboratory (GNL) where this research was conducted (UTMB) is fully accredited  
195 by the Association for the Assessment and Accreditation of Laboratory Animal Care  
196 International and has an approved OLAW Assurance (#A3314-01). Animal studies were  
197 performed in BSL-4 biocontainment at the University of Texas Medical Branch (UTMB)  
198 and the protocol was approved by the UTMB Institutional Biosafety Committee.

199

## 200 **Animal challenge**

201 Eighteen adult (9 females and 9 males) cynomolgus macaques (*Macaca fascicularis*) of  
202 Chinese origin (PreLabs, Worldwide Primates) ranging in age from 3 to 8 years and  
203 weighing 2.86 to 7.60 kg were used for three separate studies at the GNL. Macaques were  
204 immunized with a single 10 million PFU intramuscular (i.m.) injection of rVSV-N4CT1-  
205 MARV-GP at 7 (N=5), 5 (N=5), or 3 (N=5) days prior to MARV exposure. Three animals  
206 were immunized with an identical dose of rVSVN4CT1-HIVgag at each respective time  
207 point to serve as non-specific controls. The inoculation was equally distributed between  
208 the left and right quadriceps. All macaques were challenged i.m. in the left quadriceps with  
209 a uniformly lethal 1000 PFU target dose of MARV-Angola (actual doses were 1475, 1475,  
210 and 1300 PFU, respectively). An internal scoring protocol was implemented to track  
211 disease progression in challenged animals. Animals were checked at least twice daily for  
212 scoring criteria such as posture/activity level, appetite, behavior, respiration, and the  
213 presence of hemorrhagic manifestations. Subjects that reached a clinical score  $\geq 9$  were  
214 promptly euthanized with a pentobarbital solution.

215

## 216 **Blood collection**

217 Blood was collected by venipuncture into EDTA and serum tubes pre-challenge and 3, 6,  
218 10, 14, 21, and 28 DPI, or terminally. An aliquot of EDTA-treated whole blood (100  $\mu$ l)  
219 was diluted with 600  $\mu$ l of AVL inactivation buffer (Qiagen, Hilden, Germany), and RNA  
220 was extracted using a Viral RNA mini-kit (Qiagen) according to the manufacturer's  
221 instructions. To isolate plasma and serum, tubes were spun at 2500 rpm for 10 minutes at  
222 4°C. EDTA plasma and serum were stored at -80°C for analysis.

## 223 **Hematology and clinical chemistry**

224 Total white blood cell counts, white blood cell differentials, red blood cell counts, platelet  
225 counts, hematocrit values, mean cell volumes, mean corpuscular volumes, total  
226 hemoglobin concentrations, and mean corpuscular hemoglobin concentrations were  
227 analyzed from blood collected in tubes containing EDTA using a laser based hematologic  
228 analyzer (VetScan HM5). Serum samples were tested for concentrations of albumin,  
229 amylase, alanine aminotransferase (ALT), alkaline phosphatase (ALP), gamma-  
230 glutamyltransferase (GGT), aspartate aminotransferase (AST), glucose, total protein,  
231 cholesterol, total bilirubin (TBIL), creatine (CRE), blood urea nitrogen (BUN), and C-  
232 reactive protein (CRP) by using a Piccolo point-of-care analyzer and Biochemistry Panel  
233 Plus analyzer discs (Abaxis).

234

## 235 **Viral Load Determination**

236 One-Step Probe RT-qPCR kits (Qiagen) and CFX96 system/software (BioRad) were used  
237 to determine viral copies in samples. To detect MARV RNA, we targeted the MARV NP  
238 gene with primer pairs and a 6-carboxyfluorescein (6FAM) - 5' -  
239 CCCATAAGGTCACCCTCTT-3' -6 carboxytetramethylrhodamine (TAMRA) probe.  
240 Thermocycler run settings were 50 °C for 10 min; 95 °C for 10 s; and 40 cycles of 95 °C  
241 for 10 s plus 59 °C for 30 s. Integrated DNA Technologies synthesized all primers and Life  
242 Technologies customized the probes. Representative MARV genomes were calculated  
243 using a genome equivalent standard. The limit of detection for this assay is 1000 copies/ml.

244 Infectious MARV loads were determined using a standard plaque assay. Briefly,  
245 increasing 10-fold dilutions of plasma samples were adsorbed to Vero E6 monolayers  
246 (ATCC Cat: CRL-1586) in duplicate wells (200  $\mu$ l), overlaid with 0.8% agarose/2x  
247 EMEM, and incubated for six days at 37 °C in 5% CO<sub>2</sub>. Neutral red stain was added, and  
248 plaques were counted after a 24- to 48-hour incubation. The limit of detection for this assay  
249 is 25 PFU/ml.

250

## 251 **NanoString sample preparation**

252 Targeted transcriptomics was performed on blood samples from macaques as previously  
253 described [33]. NHPV2\_Immunology reporter and capture probesets (NanoString  
254 Technologies) were hybridized with 5  $\mu$ l of each RNA sample for ~24 hours at 65°C. The  
255 RNA:probeset complexes were then loaded onto an nCounter microfluidics cartridge and  
256 assayed using a NanoString nCounter® SPRINT Profiler. Samples with an image binding  
257 density greater than 2.0 were re-analyzed with 2  $\mu$ l of RNA to meet quality control criteria.

258

## 259 **Transcriptional analysis**

260 Briefly, nCounter® .RCC files were imported into NanoString nSolver™ 4.0 software. To  
261 compensate for varying RNA inputs, an array of housekeeping genes and spiked-in positive  
262 and negative controls were used to normalize the raw read counts. The data was analyzed  
263 with NanoString nSolver™ Advanced Analysis 2.0 package to generate principal  
264 component (PC) figures, volcano plots, and cell-type trend plots. Human annotations were  
265 added for each respective mRNA to perform immune cell profiling within nSolver™.

266 Normalized data (fold-change- and p-values) were exported as a .CSV file and imported  
267 into GraphPad Prism version 9.3.1 to produce transcript heatmaps. To identify the  
268 functional annotation of individual transcripts, we interrogated the GeneCard database  
269 (<https://www.genecards.org>) [34]. For pathway analysis, functional enrichment of  
270 normalized counts was performed at the time of challenge, and early, mid, and late disease  
271 with Ingenuity Pathway Analysis (Qiagen). Z-scores were imported into GraphPad Prism  
272 version 9.3.1 to produce the canonical signaling heatmap.

273

## 274 **Anti-MARV GP IgM and IgG ELISA**

275 MARV GP-specific IgM and IgG antibodies were quantified by ELISA on sera collected  
276 at the indicated blood collection days. Immunosorbent MaxiSorp 96-well plates were  
277 coated overnight with 15 ng/well (0.15mL) of recombinant MARV GP $\Delta$ TM ( $\Delta$ TM:  
278 transmembrane region absent; Integrated Biotherapeutics, Gaithersburg, MD) in a sodium  
279 carbonate/bicarbonate solution (pH 9.6). Antigen-adsorbed wells were subsequently  
280 blocked with 2% bovine serum antigen (BSA) in 1 x PBS for at least two hours. Sera were  
281 initially diluted 1:100 and then two-fold through 1:12800 in ELISA diluent (2% BSA in  
282 1x PBS, and 0.2% Tween-20). After a one-hour incubation, cells were washed four times  
283 with wash buffer (1 x PBS with 0.2% Tween-20) and incubated for an hour with a dilution  
284 of horseradish peroxidase (HRP)-conjugated anti-rhesus IgM (1:2500) or IgG antibody  
285 (1:5000) (Fitzgerald Industries International, Acton, MA). SigmaFast O-phenylenediamine  
286 (OPD) substrate (Sigma; P9187) was added to the wells after four additional washes to  
287 develop the colorimetric reaction. The reaction was stopped with 3M sulfuric acid ~5  
288 minutes after OPD addition and absorbance values were measured at a wavelength of

289 492nm on a Cytex Cytation 5. Absorbance values were determined by subtracting uncoated  
290 from antigen-coated wells at the corresponding serum dilution. End-point titers were  
291 defined as the reciprocal of the last adjusted serum dilution with a value  $\geq 0.20$ .

292

## 293 **Statistical analysis**

294 Statistical analysis of viral load was carried out in GraphPad Prism version 9.3.1  
295 (GraphPad, Software, Inc., La Jolla, CA) using a mixed-effects model with Geisser-  
296 Greenhouse correction and a Dunnett's multiple comparisons test. A multiple hypothesis  
297 Benjamini-Hochberg false discovery rate (FDR) corrected p-value less than 0.05 was  
298 deemed significant for transcriptional analyses, unless otherwise stated. A Pearson  
299 correlation coefficient was employed to measure linear correlation between individual  
300 subject viremia levels and expression of specific DE transcripts.

301

## 302 **Results**

303 To define the prophylactic window afforded by Vesiculovax vaccination against MVD, we  
304 immunized 15 cynomolgus macaques with a single 10 million PFU i.m. dose of  
305 rVSVN4CT1-MARV-GP at 7 (N=5), 5 (N=5), or 3 (N=5) days before challenge (**Fig 1A**).  
306 Three additional subjects were inoculated with an irrelevant rVSVN4CT1-HIV-gag1  
307 vaccine at 7 (N=1), 5 (N=1), or 3 (N=1) days prior to MARV exposure to control for non-  
308 specific effects of the vector. All macaques were i.m. challenged with a uniformly lethal  
309 target dose of 1000 PFU of MARV-Angola and observed daily for signs of illness up to  
310 the 28 days post-infection (DPI) study endpoint.

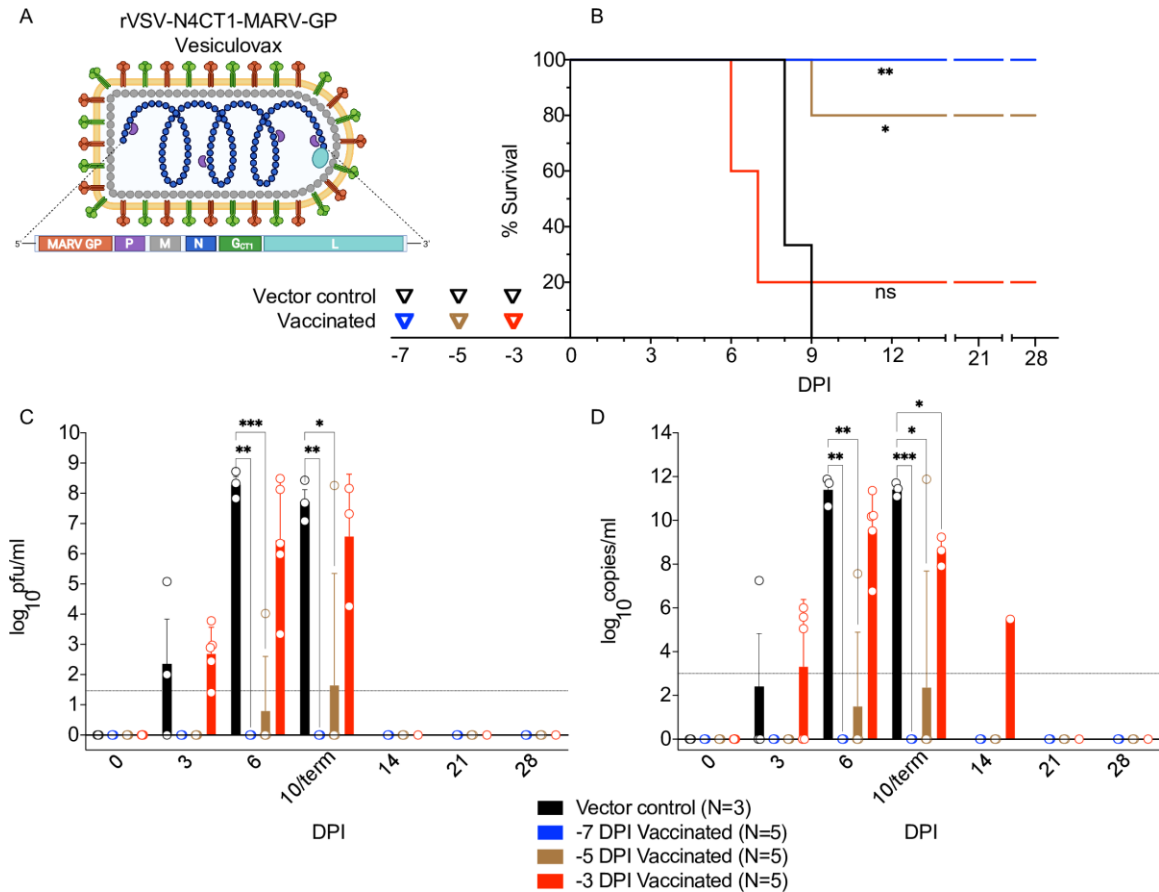

311

312 **Fig 1. Study Design and comparison of viral loads in vaccinated macaques exposed to**  
 313 **MARV-Angola.**

314 **(A)** rVSV-N4CT1-MARV-GP vector design and genome organization. The Vesiculovax  
 315 vaccine encodes a truncated form (CT1) of the native VSV G (green box); the N gene was  
 316 translocated from the 1<sup>st</sup> position to the 4th position (N4) of the genome (blue box). The  
 317 MARV GP glycoprotein is expressed from the 1<sup>st</sup> position to increase immunogen  
 318 expression (orange box). **(B)** Survival curves of vaccinated cohorts immunized with rVSV-  
 319 N4CT1-MARV-GP at -7 DPI (blue; n=5), -5 DPI (brown; n=5), or -3DPI (red; n=5). A  
 320 single vector control subject was vaccinated at each respective time point (black; n=3). A  
 321 log-rank test was used to determine statistical significance. Triangles on the x-axis indicate  
 322 time of vaccination for each respective cohort. **(C)** Plasma viremia was measured by



323 standard plaque assay at the denoted time points and reported as log<sub>10</sub> PFU/ml. The limit  
324 of detection for this assay is 25 PFU/ml (indicated by a dotted horizontal line). **(D)** Viral  
325 loads were measured by RT-qPCR in whole blood and reported as log<sub>10</sub> copies/ml at the  
326 denoted time points. The limit of detection for this assay is 1000 copies/ml (indicated by a  
327 dotted horizontal line). For **(C)** and **(D)**, the average titer  $\pm$  SEM is shown for each group  
328 at the denoted time points. Statistical significance was determined using a mixed-effects  
329 model with Geisser-Greenhouse correction and Dunnett's multiple comparisons test. Not  
330 significant (ns);  $p < 0.0332$  (\*);  $p < 0.0021$  (\*\*);  $p < 0.0002$  (\*\*\*). Abbreviations: rVSV,  
331 recombinant Vesicular stomatitis virus; MARV, Marburg virus; GP, MARV glycoprotein;  
332 VSV, Vesicular stomatitis virus; G, VSV glycoprotein; N, VSV nucleoprotein; P, VSV  
333 phosphoprotein; M, VSV matrix protein; L, VSV polymerase; DPI, days post vaccination;  
334 PFU, plaque-forming units.

335 Vaccination with an irrelevant or antigen-specific vector did not appear to delay the  
336 onset of disease (**Fig 1B**). The time-to-death (TTD) was 8-9 DPI for the vector controls  
337 and 6-9 DPI for fatal subjects that were specifically vaccinated (chi square test  $p = 0.2229$ ).  
338 This window is in line with the typical TTD for this animal model (6-9 DPI, mean of 7.3  
339 days) [17, 20, 35]. As expected, animals immunized earlier before challenge had a higher  
340 rate of survival. Survival rates of groups immunized with rVSVN4CT1-MARV-GP were  
341 significantly different than the vector control group with 100% (log-rank test,  $p = 0.0046$ )  
342 and 80% ( $p = 0.0153$ ) efficacy for -7 DPI and -5 DPI groups, respectively. No statistical  
343 difference ( $p = 0.5110$ ) was noted for the -3 DPI vaccination group, although a sole subject  
344 (20%) survived.

345           Regardless of the rVSV vaccine vector administered, all fatal cases presented with  
346 typical MVD clinical signs such as fever, anorexia, dyspnea, macular rash, and/or  
347 depression (**S1-S3 Tables**). Specifically vaccinated survivors remained healthy and did not  
348 display clinical signs of disease other than anorexia at 5 DPI in one subject in the -7 group  
349 (Survivor 4) (**S1 Table**) and transient anorexia and a mild petechial rash in the sole survivor  
350 (Survivor 10) in the -3 group (**S3 Table**). However, all survivors exhibited various  
351 hematological changes over the course of the study. Postmortem gross examination of fatal  
352 cases in both specifically and non-specifically vaccinated macaques revealed lesions  
353 consistent with MVD including subcutaneous hemorrhage; necrotizing hepatitis  
354 (characterized as hepatic pallor with reticulation); splenomegaly; lymphadenitis; and  
355 hemorrhagic interstitial pneumonia (characterized as failure to completely collapse and  
356 multifocal reddening of the lungs) (**data not shown**). No significant lesions were detected  
357 in examined tissues of vaccinated survivors at the study endpoint.

358           As anticipated, serum levels of liver enzymes and kidney function products  
359 indicative of organ damage including alanine aminotransferase (ALT), alkaline  
360 phosphatase (ALP), aspartate aminotransferase (AST), gamma-glutamyltransferase  
361 (GGT), blood urea nitrogen (BUN), and creatinine (CRE) were elevated in fatal cases (**S1-**  
362 **S3 Tables**). These changes were also noted in Survivor 10 of the -3 group. Lethality also  
363 corresponded with elevated CRP along with lymphopenia, thrombocytopenia, and  
364 neutrophilia.

365           Survival correlated with lower viral load (**Fig 1C and 1D and S1-3 Tables**). Viral  
366 titers were assessed in each cohort by performing RT-qPCR amplification of viral RNA  
367 (vRNA) and conventional plaque assays. Remarkably, neither infectious MARV nor

368 vRNA was detected in survivors in the -7 and -5 groups (**S1 and S2 Tables**), whereas the  
369 single specifically vaccinated animal that succumbed (Fatal 1) in the -5 cohort had a viral  
370 titer of 4.02 LOG<sub>10</sub> PFU/ml (7.56 LOG<sub>10</sub> copies/ml) at 6 DPI. In comparison, viral loads  
371 in vector controls were 3-5 logs higher at the same time point. Similarly, a lower level of  
372 viremia was detected in the single survivor (Survivor 10) of the -3 cohort (Survivor 10)  
373 (**S3 Table**). Viral titers were comparable between fatal animals and controls at end-stage  
374 disease (~ 6-8 LOG<sub>10</sub> PFU/ml (~ 9-11 LOG<sub>10</sub> copies/ml)).

375 To characterize the immune response to Vesiculovax immunization, we performed  
376 targeted transcriptomics on whole blood RNA from MARV-exposed vaccinated AGMs.  
377 Spatial visualization of the dataset via principal component analyses (PCA) indicated RNA  
378 samples clustered independently of time of vaccination (group), but dimensional separation  
379 was observed for disposition (fatal, survivor) and DPI (0, 3, 6, 10/terminal) covariates (**Fig**  
380 **2A**). Minimal expression changes were detected in samples from surviving and non-  
381 surviving subjects on the day of challenge. Thereafter, fatal samples exhibited timepoint-  
382 distinct clustering irrespective of whether they were derived from specifically or non-  
383 specifically vaccinated subjects, denoting similar transcriptional profiles among these  
384 animals. Most survivor samples displayed minimal spatial variation at each DPI regardless  
385 of the time of vaccination, suggesting overall expression changes in surviving subjects  
386 were modest.

387

388

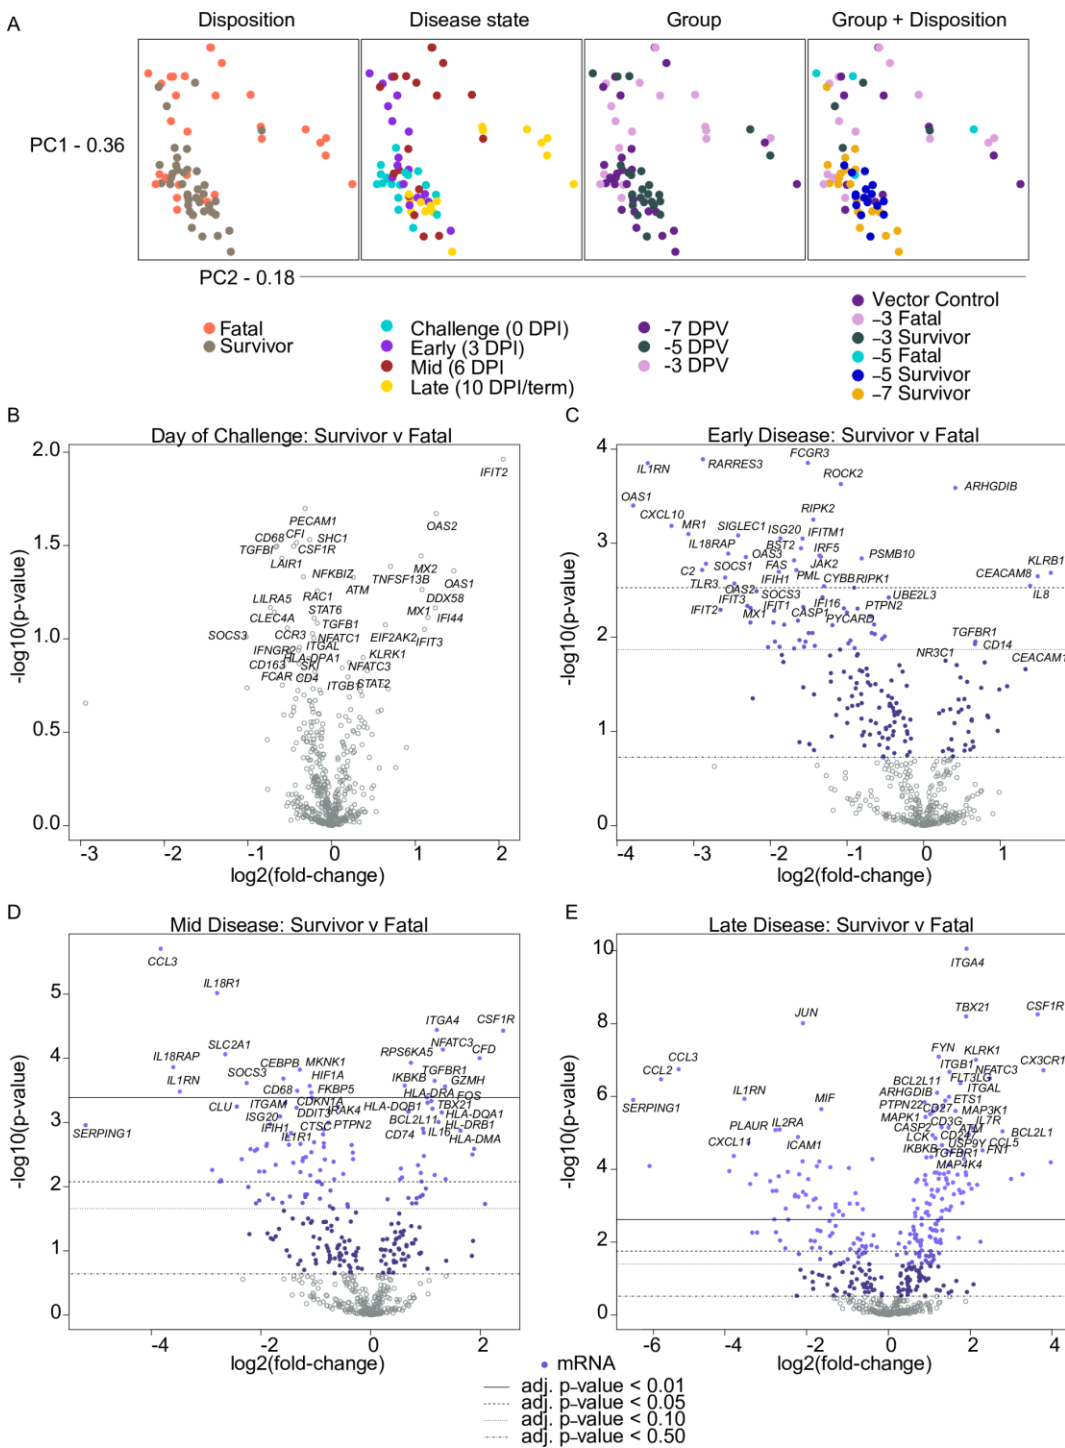

**Fig**  
**2.**

391 **Principal component analysis and volcano plots depicting transcriptional changes in**  
392 **vaccinated macaques exposed to MARV-Angola.**

393 (A) Shown are principal component (PC) analyses of all normalized transcripts on the day  
394 of challenge (0 DPI), and at early (3 DPI), mid (6 DPI), and late disease (10 DPI, or the

395 terminal time point in fatal cases). Individual samples were filtered by disposition (fatal,  
396 survivor), disease state (0, 3, 6, 10/term DPI), group (day of vaccination; -7, -5, or -3 DPI),  
397 and group plus disposition (vector control (n=3), -3 fatal (n=4), -3 survivor (n=1), -5 fatal  
398 (n=1), -5 survivor (n=4), -7 survivor (n=5)). **(B)** Volcano plots displaying  $-\log_{10}(\text{p-values})$   
399 and  $\log_2$  fold changes for each mRNA target on the day of challenge (0 DPI), and at early  
400 (3 DPI), mid (6 DPI), and late disease (10 DPI, or the terminal time point in fatal cases).  
401 Horizontal lines within the plot indicate adjusted p-value thresholds. Targets highlighted  
402 in blue indicate those differentially expressed in the survivor versus fatal group irrespective  
403 of time of vaccination or vector administered with a multiple hypothesis Benjamini-  
404 Hochberg false discovery rate (FDR) corrected p-value less than 0.05. Abbreviations: PC1  
405 (principal component 1); PC2 (principal component 2); DPI, days post infection.

406

407 To identify transcriptional signatures of protection, we performed differential  
408 expression analysis of survivor and fatal samples at each DPI. Given the lack of significant  
409 variation among group (day of vaccination) or vaccine vector administered in fatal cases,  
410 we excluded these factors for this analysis. Thus, the survivor dataset included samples  
411 from specifically vaccinated survivors at each DPI without respect to time of vaccination,  
412 whereas the fatal dataset included samples from both specifically and non-specifically non-  
413 surviving subjects at each DPI without respect to time of vaccination.

414 Overall, we identified 76, 70, and 168 differentially expressed (DE) transcripts  
415 (Benjamini-Hochberg (BH)-adjusted p-value  $< 0.05$ ) in survivor versus fatal samples at  
416 early (3 DPI), mid (6 DPI), and late (10 DPI/terminal timepoint) disease, respectively (**S1**  
417 **Data**). On the day of challenge (0 DPI), survivors tended to express higher levels of

418 transcripts associated with interferon signaling (e.g., *IFIT2*, *OAS1*, *OAS2*, *MX1*, *MX2*, and  
419 *IFI44*) and retinoic acid-inducible gene I (RIG-I; *DDX58*) signal transduction that is  
420 involved in cytosolic detection of double-stranded viral RNA (**Fig 2B**). These findings  
421 suggest earlier activation of innate immunity in these subjects, although no statistically  
422 significant difference was found between survivor and fatal samples at this timepoint. At  
423 early disease (3 DPI), survivors expressed a higher abundance of natural killer (NK) cell-  
424 and cytolytic T lymphocyte (CTL)-affiliated transcripts (*KLRB1*, *KLRD1*, *GZMK*) as well  
425 as molecules involved in neutrophil chemotaxis and adhesion (*IL-8* and *CEACAM8*).  
426 Conversely, lower expression of inflammatory markers including *IL1RN* (encodes  
427 interleukin 1 receptor antagonist), *OAS1* (encodes 2'-5'-oligoadenylate synthetase 1),  
428 *CXCL10* (encodes C-X-C motif chemokine ligand 10, or IP-10), *MRI* (encodes major  
429 histocompatibility complex, class I-related), *RARRES3* (encodes IL-1 receptor antagonist),  
430 *C2* (encodes complement component C2), *IL18RAP* (encodes interleukin-18 receptor  
431 accessory protein) was evident in survivors (**Fig 2C**). At mid disease (6 DPI), survivors  
432 expressed more adaptive immunity-related transcripts (*ITGA4*, *NFATC3*, *TGFBRI*),  
433 antigen presentation-related molecules (*HLA-DQB1*, *HLA-DRA*, *HLA-DQA1*, *HLA-DRB1*,  
434 *HLA-DMA*), and NK cell-associated transcripts (*GZMH*). Also detected in survivors was  
435 increased expression of *CSF1R* (encodes a cytokine that controls the production,  
436 differentiation, and function of macrophages) and *TBX21* (the master transcriptional  
437 regulator for T helper 1 (Th1) cells). Decreased expression of molecules in survivors  
438 included those involved in complement regulation (*SERPING1*), pro-inflammatory  
439 signaling (*IL18RAP*, *IL18R1*, *IL1RN*), metabolism (*SLC2A1*), or recruitment and activation  
440 of monocytes/granulocytes (*CCL3*, *CD68*) (**Fig 2D**). At late disease, again higher

441 expression of *CSF1R*, *TBX21*, and markers of NK cell and T cell activation (*CX3CR1*,  
442 *ITGA4*, *KLRK1*, *NFATC3*, *FYN*, *CD27*, *CD3G*) was noted in survivors, with lower  
443 expression of *SERPING1*, *CCL3*, *IL1RN* (**Fig 2E**).

444 For a more granular assessment, we examined DE transcripts for each group and  
445 disposition with respect to a pre-challenge baseline. Samples from specifically vaccinated  
446 survivors at -3 DPI and specifically vaccinated fatal subjects at -5 DPI were excluded from  
447 this analysis since these cohorts only consisted of a single subject; however, a cursory  
448 examination indicated specifically vaccinated survivor versus specifically vaccinated fatal  
449 subjects tended to express higher levels of transcripts mapping to the adaptive immunity  
450 gene set when vaccinated at 5 versus 3 days prior to challenge (**S1 Fig**). The topmost  
451 upregulated and downregulated DE transcripts in subjects vaccinated with rVSV-N4CT1-  
452 MARV-GP at -7 DPI is depicted in Fig. 3. Notably, a similar transcriptional landscape was  
453 observed in survivors immunized at -5 or -7 DPI regardless of DPI in line with our PCA  
454 results (**Fig 3A**). Vector controls and non-surviving AGMs vaccinated at -3 DPI also  
455 exhibited similar expression profiles. Abundant expression of cytoplasmic granules such  
456 as granzymes (*GZMA*, *GZMB*, *GZMK*) and perforin (*PRFI*) was apparent in survivors at  
457 all time points, suggesting early and sustained activation of NK- and cytotoxic T-cells,  
458 whereas granzyme and perforin expression in fatal subjects was not detected until mid or  
459 late disease. Th1-associated Tbet (*TBX21*) was also upregulated in the Survivor -5 and  
460 Survivor -7 datasets, whereas this transcription factor was downregulated at all time points  
461 in the Fatal -3 cohort and at mid- and late disease in the vector control group. In contrast,  
462 repressed transcripts in specifically vaccinated survivors at late disease were implicated in  
463 monocyte recruitment (*CCR1*); pattern recognition receptor signaling (*TLR5*, *MYD88*); and

464 inflammation (*TNFAIP6*, *NFKBIA*) (**Fig 3B**). Thus, survivor transcriptional signatures  
 465 correlated with predicted Th1 differentiation and activation of NK cell and adaptive  
 466 responses, whereas lethality correlated with sustained innate immunity signaling and  
 467 inflammation.

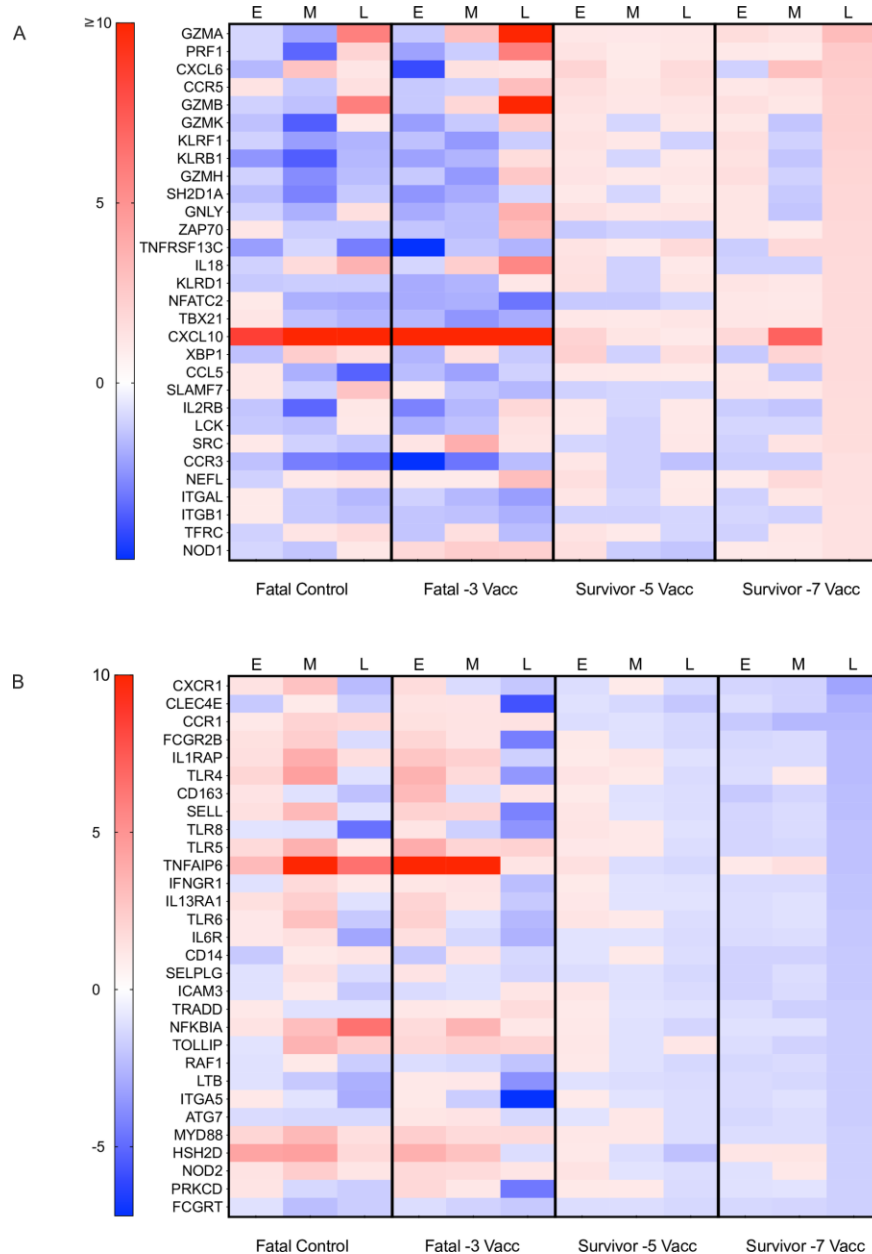

468  
 469 **Fig 3. Heatmaps depicting the most differentially expressed transcripts in**  
 470 **Vesiculovax-vaccinated survivor samples.**



471 The topmost upregulated (**A**) and downregulated (**B**) transcripts in vaccinated survivors  
472 immunized -7 DPI at late disease. Shown are expression changes in survivor cohorts  
473 (survivor -7 vacc (n=5); survivor -5 vacc (n=4)) and fatal groups (fatal vector control (n=3);  
474 fatal -3 vacc (n=4)) at each disease state (0, 3, 6, 10 DPI, or the terminal time point in fatal  
475 subjects) with respect to a pre-vaccination baseline. A Benjamini-Hochberg false discovery  
476 rate (FDR) corrected p-value less than 0.05 was deemed significant. Red indicates high  
477 expression; blue indicates low expression; white indicates no change in expression.  
478 Abbreviations: Vacc, vaccinated; E, early disease (3 DPI); M, mid disease (6 DPI); L, late  
479 disease (10 DPI or terminal timepoint).

480 Fatal outcome was associated with dramatic transcription of genes previously  
481 correlated with filovirus disease lethality. These transcripts included pro-inflammatory IP-  
482 10 (*CXCL10*; up to a 65- and 55-fold-increase in vector controls and fatal subjects,  
483 respectively) [36, 37]; neutrophil-associated calgranulin A (*S100A8*; up to an 18- and 20-  
484 fold-increase in vector controls and fatal subjects, respectively) and calgranulin B (  
485 *S100A9*; up to a 16- and 14-fold-increase in vector controls and fatal subjects, respectively)  
486 [33]; and molecules involved in immune exhaustion and anergy (*LAG3*, *CTLA4*) [38] (**S2A**  
487 **Fig**). Positive correlations were found between MARV viremia levels and *S100A8*  
488 (Pearson,  $P < 0.0001$ ), *S100A9* (Pearson,  $P = 0.0001$ ), *LAG3* (Pearson,  $P = 0.0021$ ), and  
489 *CTLA4* (Pearson,  $P = 0.0005$ ) counts (**S3 Fig**). Markedly diminished expression of mRNAs  
490 encoding complement factor D (*CFD*; up to a 32- and 38-fold-decrease) was observed in  
491 vector controls and fatal subjects, respectively (**S2B Fig**).

492 To capture shifts in circulating cell populations associated with survival, we  
493 conducted nSolver-based immune cell type profiling at 0, 3, 6, and 10 DPI (or the terminal

494 time point in euthanized subjects). In agreement with our differential expression results,  
495 survival was associated with higher frequencies of cytotoxic cells, Th1 cells, T cells, and  
496 B cells (**Fig 4**). Lower predicted frequencies of neutrophils and macrophages were detected  
497 in fatal samples at all time points, confirming our hematology results. Contradicting our  
498 DE analysis, decreased frequencies of CD56<sup>dim</sup> NK subsets were found in vaccinated  
499 survivors at certain time points. This discrepancy could reflect species-specific  
500 immunogenetic differences that exist between human and macaques [39, 40] as the nSolver  
501 profiling algorithm relies on human NK cell annotations for cell type profiling.

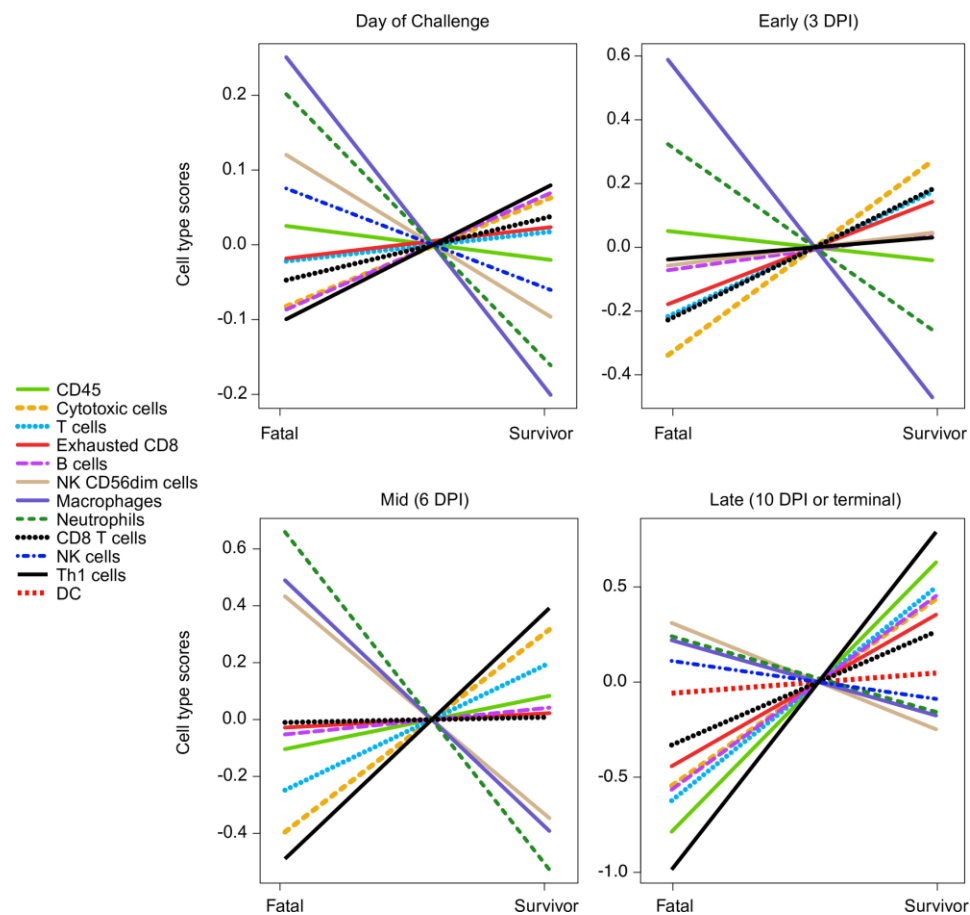

502

503 **Fig 4. Immune cell type profiling of Vesiculovax-vaccinated survivor and fatal**  
504 **samples.**

505 Respective cell-type quantities for vaccinated survivor (n=10) and fatal (n=8) cohorts on  
506 the day of challenge (0 DPI), and early (3 DPI), mid (6 DPI), and late disease (10 DPI, or  
507 the terminal time point in fatal cases). A Benjamini-Hochberg false discovery rate (FDR)  
508 corrected p-value less than 0.05 was deemed significant for immune cell type profiling of  
509 transcripts. DPI, days post infection.

510 Next, enrichment of DE transcripts was executed to unravel canonical signaling  
511 pathways associated with rVSV-N4CT1-MARV-GP-elicited protection. At mid and late  
512 disease, the top upregulated pathways in survivor versus fatal cases included “PKC-theta  
513 signaling in T lymphocytes”, “calcium-induced T lymphocyte apoptosis”, “ICOS-iCOSL  
514 signaling in T helper cells”, “CD28 signaling in T-cell helper cells”, and “CD27 signaling  
515 in lymphocytes” (**Fig 5**). Thus, positive z-scores in survivors were associated with T cell  
516 activation and differentiation of antigen-specific T-cells. Downregulated pathways in  
517 survivors at these timepoints included those involved in innate immunity signaling (“role  
518 of pattern recognition receptors in recognition of bacteria and viruses”, “interferon  
519 signaling”, “activation of IRF by cytosolic pattern recognition receptors”) or immune  
520 dysregulation (“systemic lupus erythematosus in B cell signaling pathway”, “PD-1, PDL-1  
521 cancer immunotherapy”).

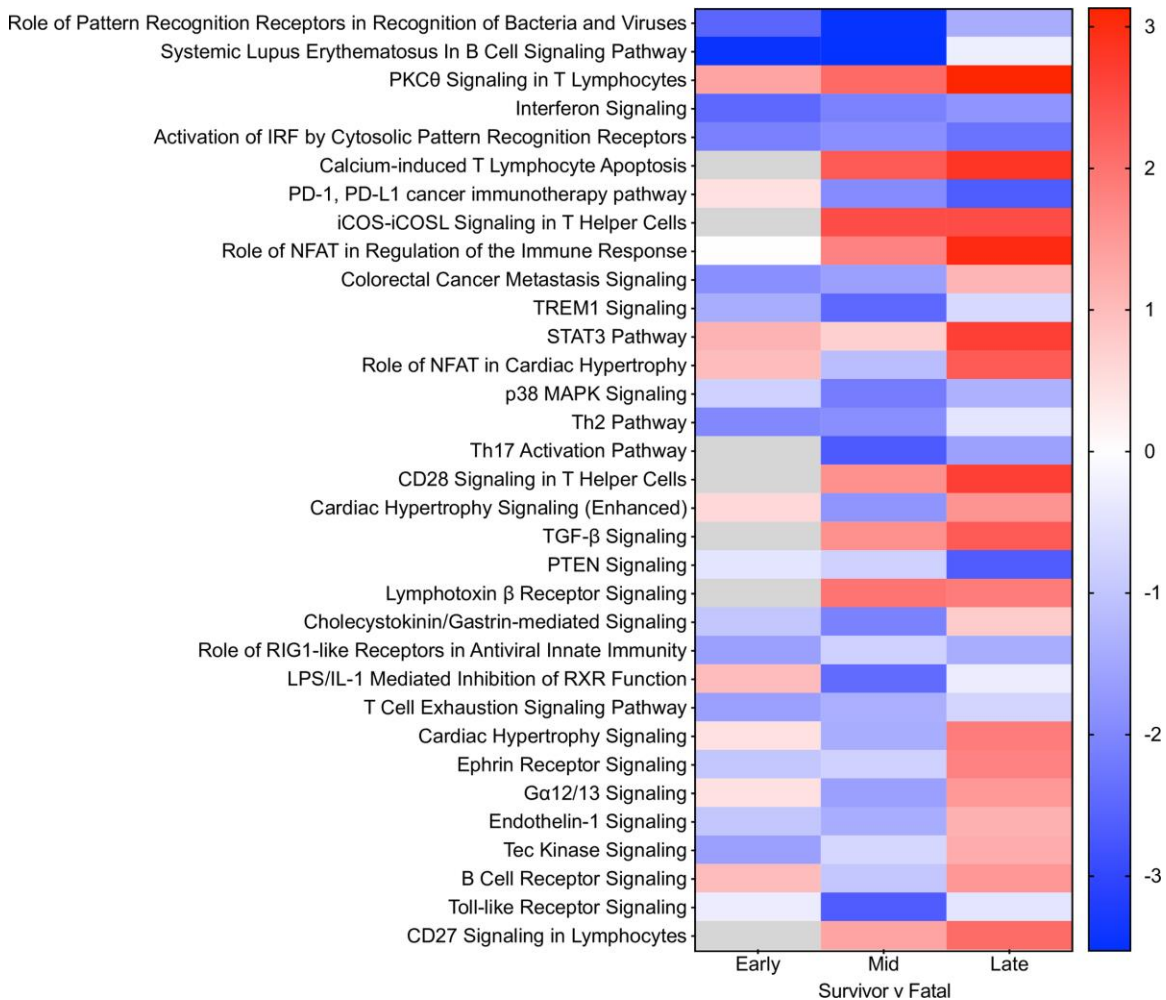

522

523 **Fig 5. Differentially expressed canonical signaling pathways in Vesiculovax-**  
 524 **vaccinated macaques.**

525 Heatmap of the most significantly upregulated and downregulated canonical pathways in  
 526 survivor versus fatal subjects based on functional enrichment of differentially expressed  
 527 transcripts (Benjamini-Hochberg false discovery rate (FDR) corrected p-value less than  
 528 0.05) in vaccinated survivor (n=10) versus fatal (n=8) samples. Cohorts were examined at  
 529 early (3 DPI), mid (6 DPI), and late disease (10 DPI, or the terminal time point in fatal  
 530 cases). DPI, days post infection. Corresponding z-scores were plotted. Red indicates high

531 expression; blue indicates low expression; white indicates no difference in expression; gray  
532 indicates insufficient transcripts mapping to the pathway.

533 Lastly, we measured serum IgG and IgM levels in vaccinated macaques to define  
534 the contribution of the humoral response to rVSV-N4CT1-MARV-GP-elicited protection.  
535 Only specifically vaccinated survivors formed substantial MARV-GP-specific IgG titers,  
536 with earlier detection of both immunoglobulin classes in subjects immunized 7 days prior  
537 to challenge (as early as the day of challenge in one subject) (**Fig 6A and 6B**). All surviving  
538 subjects had detectable IgG titers by 6 DPI, whereas no evidence of IgG was evident in  
539 vector control or non-surviving vaccinated macaques. Low IgM titers (1:100 to 1:800)  
540 generally declined during the convalescent stage conjointly with increasing moderate to  
541 high titers of IgG (1:400 to 1:12,800) (**Fig 6B**).

542

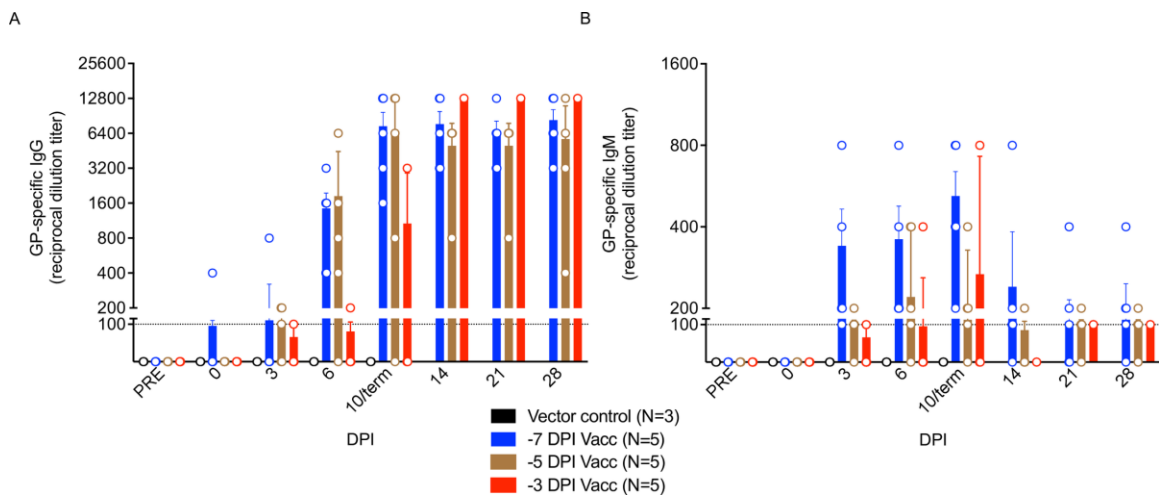

543 **Fig 6. Reciprocal endpoint dilution titers of anti-MARV GP IgG and IgM in**  
544 **Vesiculovax-vaccinated cynomolgus macaques.**

545 MARV GP-specific (A) IgG and (B) IgM titers in vaccinated cohorts immunized with  
546 rVSV-N4CT1-MARV-GP at -7 DPI (blue; n=5), -5 DPI (brown; n=5), or -3DPI (red; n=5),  
547 or a vector control (black; n=3). The mean titer  $\pm$  SEM is shown for each group at the

548 denoted time points. Abbreviations: IgG, immunoglobulin G; IgM, immunoglobulin M;  
549 DPI, days post infection; term, terminal; MARV, Marburg virus; GP, glycoprotein; PRE,  
550 pre-vaccination baseline.

551

## 552 **Discussion**

553 In a prior study, we showed that a highly attenuated rVSV-based vector, rVSV-N4CT1-  
554 MARV-GP, administered 20-30 minutes postexposure to a low dose MARV-Angola  
555 challenge afforded partial protection (60% survival) of NHPs [14]. As an extension of this  
556 previous work, we determined the minimum time needed between immunization and  
557 exposure to fully protect NHPs against MVD. Here, vaccination of macaques with a single  
558 10 million PFU dose of rVSV-N4CT1-MARV-GP one week prior to MARV-Angola  
559 challenge resulted in lack of detectable viremia in these animals with protection from  
560 clinical disease and lethality. [27]. However, we detected changes in bloodwork of  
561 surviving subjects indicative of very mild disease in the absence of clinical signs.  
562 Immunization at 5 or 3 days before exposure resulted in 80% and 20% survival,  
563 respectively. Thus, this highly attenuated Vesiculovax vector provided comparable  
564 protection (100% survival) as the delta G vector as a rapid vaccine when administered one  
565 week before exposure. Although higher survival was reported for the delta G vector when  
566 given -3 days pre-challenge; no statistically significant difference was found between the  
567 two vaccines (log rank test, data not shown). Small group sizes used in the previous study  
568 make a direct comparison of vaccine efficacy difficult to interpret. Nevertheless, the fast-  
569 acting protection of rVSV-N4CT1-MARV-GP supports the use of Vesiculovax vaccines  
570 to combat future outbreaks of MVD. As a testament to this potential, ring vaccination with

571 a similar EBOV-specific rVSV vector, Ervebo, reduced mortality and virus transmission  
572 during the 2013-2016 West Africa EBOV epidemic and 2018-2020 DRC EBOV outbreak  
573 [11, 12].

574 While the Ervebo “delta G (rVSVΔG)” vaccine appears highly efficacious, some  
575 undesirable vaccine-associated events have been reported in humans, particularly in  
576 individuals receiving high doses. Besides common vaccine reactions (injection site pain,  
577 fatigue, headache, muscle pain), these side effects included moderate to severe arthritis  
578 (with pain lasting a median of 8 days), postvaccination fever persisting for days, cutaneous  
579 vasculitis, and dermatitis manifesting as vesicular, maculopapular, or purpuric lesions  
580 distal to the inoculation site [28, 29]. Recovery of virus from synovial fluid and skin  
581 vesicles confirmed dissemination of the vaccine vector in peripheral tissues. Lowering the  
582 dose of Ervebo reduced reactogenicity, but also decreased immunogenicity and did not  
583 prevent arthritis, dermatitis, or cutaneous vasculitis in vaccinees. Although replication of  
584 the vaccine vector likely contributes to the rapid protection achieved with Ervebo, high  
585 viral loads throughout the body raises concerns about the potential short- and long-term  
586 effects of the vaccine. For these reasons, Ervebo is primarily indicated for reactive  
587 vaccination of individuals at high risk of exposure. A vaccine with comparably efficacy  
588 but a safer profile would be preferred for widespread use. Indeed, a rVSV-N4CT1 vector  
589 expressing EBOV GP protein similarly protected NHPs from lethal EBOV challenge  
590 despite a high degree of attenuation [41, 42] and was well tolerated and immunogenic in  
591 phase I clinical evaluation (<https://clinicaltrials.gov/ct2/show/NCT02718469>) [30]. The  
592 vaccine elicited robust EBOV GP-specific IgG responses and modest but balanced cellular  
593 immune responses. Importantly, no incidents of vaccine shedding, arthritis, nor skin rashes

594 were reported in vaccinees at any dose tested including individuals given a high 18 million  
595 PFU dose. Based on these results, we anticipate rVSV-N4CT1-MARV-GP can similarly  
596 serve as a safe, immunogenic, and effective vaccine against MVD suitable for both  
597 preventive and reactive immunization.

598         The specific mechanisms of rapid rVSV-elicited protection are not fully elucidated  
599 but are thought to involve stimulation of both innate and adaptive immunity [13, 27, 43-  
600 45]. Resistance to disease was strongly tied to early control of MARV replication. On the  
601 day of challenge, specifically vaccinated survivors compared to fatal cases tended to  
602 express higher levels of transcripts associated with interferon and RIG-I signaling,  
603 indicating a robust innate response may be needed to shape protective immunity. In  
604 survivors, innate signaling promptly resolved after MARV exposure unlike fatal cases  
605 concurrently with an accumulation of adaptive immunity-related transcripts, particularly  
606 in earlier vaccinated subjects. Administration of a non-specific rVSVN4CT1-HIV-gag1  
607 vector control did not appear to delay the time-to-death and resulted in complete lethality  
608 of macaques following exposure to MARV-Angola, indicating MARV GP-specific  
609 responses modulate host resistance to MVD. This hypothesis is supported by the lack of  
610 substantial antibody titers and the absence of adaptive signaling in vector control subjects.  
611 Conversely, MARV GP-specific IgM and IgG titers were detected in all specifically  
612 vaccinated survivors by 0-6 DPI, and increased transcriptionally derived B cell, cytotoxic  
613 cell, and Th1 cell predicted frequencies were detected in these subjects as early as the day  
614 of challenge. Thus, humoral and cellular immune responses directed at the GP correlate  
615 with survival as we have previously shown [13].



616 Fatal outcome in vaccinated subjects corresponded with dramatic upregulation of  
617 transcripts encoding pro-inflammatory IP-10 and neutrophil-associated S100A8 and  
618 S100A9, which were previously reported to correlate with EBOV lethality in humans [36,  
619 37] and in NHPs infected with *Bundibugyo ebolavirus* [33]. Similarly, lethality correlated  
620 with expression of immune checkpoint molecules as reported in other studies (*LAG3* [13],  
621 *CTLA4* [38]). Thus, certain factors associated with host susceptibility to MVD appear  
622 shared among various filovirus infections. The most significantly downregulated mRNA  
623 in vector control and vaccinated non-surviving subjects was complement factor D (*CFD*),  
624 a serine protease that cleaves complement factor B in the alternative complement pathway  
625 leading to downstream activation of the membrane attack complex [46]. As CFD is known  
626 to participate in opsonization and killing of pathogens, and viruses are commonly known  
627 to evade the complement system, this novel filovirus disease mechanism should be further  
628 explored.

629 Our transcriptomic results revealed NK cells and cytotoxic T cells are strongly  
630 implicated in rVSV-N4CT1-MARV-GP-associated fast-acting protection. Transcripts  
631 encoding cytoplasmic granules including perforin (*PRF1*), granzyme A (*GZMA*),  
632 granzyme B (*GZMA*), granzyme K (*GZMA*), and granzyme H (*GZMH*) were among the  
633 topmost upregulated molecules in vaccinated survivors. Not until late disease did we  
634 observe granzyme expression in fatal subjects. Activation of lymphocytes in non-survivors  
635 likely represents cytokine-mediated and not antigen-dependent T-cell activation as  
636 filovirus infection is known to interfere with antigen presentation [47, 48], and these  
637 subjects exhibited high viral loads. Increased expression of transcripts encoding killer cell  
638 lectin-type receptors (*KLRF1* (NKp80), *KLRB1* (CD161), *KLRD1* (CD94)) was also

639 evident in surviving subjects. These receptors are ubiquitously expressed on NK cells and  
640 are involved in stimulation and regulation of cytotoxicity or self-nonsel self discrimination,  
641 further supporting this claim.

642 Previously, we showed higher overall NK cell frequencies and recruitment of a  
643 specific subset (CD16<sup>+</sup>) of NK cells were important for postexposure protection against  
644 MVD with rVSVΔG and rVSV-N2CT1 vectors [13]. CD16<sup>+</sup> CD8a<sup>+</sup> NK cells in NHPs  
645 represent the equivalent of the highly cytotoxic CD56<sup>dim</sup> NK cell subset in humans [40].  
646 These cells have limited cytokine-secreting potential but participate in killing virally  
647 infected cells or initiating antibody-dependent cell-mediated cytotoxicity (ADCC).  
648 Accordingly, depletion studies have revealed NK cell-intact mice survive longer after a  
649 mouse-adapted EBOV challenge, which is further enhanced by postexposure treatment  
650 with a rVSVΔG expressing EBOV GP (VSVΔG/EBOV GP) [49]. The authors of this study  
651 reported treatment with VSVΔG/EBOV GP treatment resulted in significantly higher NK  
652 cell-mediated cytotoxicity and IFN- $\gamma$  secretion. Furthermore, recent research using a  
653 systems biology approach has identified NK cells as a primary correlate of antibody  
654 induction in humans receiving Ervebo. [44]. Specifically, the authors found that the  
655 frequency of CD56<sup>bright</sup> NK cells on day 3 postvaccination and the expression of CXCR6  
656 on CD56<sup>dim</sup> NK cells on day 1 postvaccination positively correlated with antibody  
657 responses suggesting a potential role for antibody-mediated NK cell activation in vaccine-  
658 induced immune responses [50]. Thus, early NK cell differentiation status may dictate Fc-  
659 mediated activation of NK cells. This finding may be of relevance as antibody neutralizing  
660 capacity is not highly correlative of protection against MVD, and only low levels of  
661 neutralizing antibodies are typically detected following rVSV-MARV vaccination [13, 27].

662 Antibody neutralizing capacity and non-neutralizing antibody mechanisms were not  
663 assessed in this study, but future examinations should examine the role of ADCC and other  
664 Fc-mediated antibody effector functions in rVSV-N4CT1-MARV-GP-mediated protection  
665 against MVD.

666 Other immune components may also confer rVSV-N4CT1-MARV-GP protection.  
667 Results from clinical trials showed VSV $\Delta$ G/EBOV GP elicited GP-specific CTLs,  
668 follicular T helper cells, and IFN- $\gamma$ -secreting T helper cells [51-53]. Not surprisingly, Tbet  
669 (*TBX21*), the lineage-defining transcription factor for Th1 cells [54], was one of the most  
670 significantly upregulated transcripts in survivors 3-10 DPI in this study. Th1 cells secrete  
671 IFN- $\gamma$  and IL-2 and represent a lineage of CD4<sup>+</sup> effector T cells that promote cell-mediated  
672 immunity and defense against intracellular pathogens. As we've previously reported,  
673 postexposure survival against MVD following rVSV vaccination corresponded with  
674 increased polyfunctional IFN- $\gamma$ <sup>+</sup> and IL-2<sup>+</sup> MARV GP-specific Th1 cells [13]. Other  
675 effector functions of Tbet include promotion of 1) immunoglobulin class switching, 2) the  
676 terminal differentiation of CD8<sup>+</sup> T cells, 3) the maturation of NK cells, and 4) the secretion  
677 of cytoplasmic granules such as granzymes (46). Additionally, Tbet can protect the host  
678 from amplification of aberrant innate responses by dampening type-I IFN transcription  
679 factors and IFN-stimulated genes [55], which are highly expressed after MARV-Angola  
680 infection [56] and corresponded with lethal outcome in this study. Our pathway analysis  
681 supported activation of T cell responses and simultaneous repression of pathways involved  
682 in pattern recognition receptor and interferon signaling in line with this reasoning. Based  
683 on these collective findings, we infer virus-specific cytotoxic and helper T cells, along with  
684 plasma cells and NK cells, likely play a key role in defense against MVD.

685           While the molecular mechanisms involved in swift protection against MVD need  
686 additional clarification, we demonstrate that innate and adaptive immunity likely act in  
687 concert to elicit fast-acting protection. Further investigation is needed to determine how  
688 individual host responses to rVSV-N4CT1-MARV-GP vaccination alter susceptibility to  
689 MVD. In conclusion, the rapid protection mediated by rVSV-N4CT1-MARV-GP, along  
690 with promising safety and immunogenicity data from a phase I clinical evaluation with an  
691 analogous rVSV-N4CT1 vaccine, supports the testing of rVSV-N4CT1-MARV-GP in  
692 phase I clinical trials as the next step in developing an effective and safe vaccine against  
693 MARV. Our results indicate highly attenuated Vesiculovax vaccines may be suitable for  
694 ring vaccination during MVD outbreaks to save lives and reduce community transmission.  
695

## 696 **Acknowledgements**

697 The authors wish to thank the UTMB Animal Resource Center for husbandry support of  
698 laboratory animals. We wish to thank Drs. Kevin Melody and Abhishek Prasad for  
699 assistance with the animal experiments.

## 700 **References**

701

702 1. Woolsey C, Geisbert, TW, and Cross, RW. Marburg and Ravn Viruses  
703 (Filoviridae). Bamford D, Zuckerman, M, editor. Encyclopedia of Virology, 4th edition:  
704 Oxford: Academic Press Vol 2 (608-618); 2021.

705 2. WHO. 2018 Annual review of diseases prioritized under the Research and  
706 Development Blueprint. Geneva, Switzerland. Accessed 09 Dec 2021:  
707 <https://www.who.int/emergencies/diseases/2018prioritization-report.pdf>. 2018.

708 3. CDC/USDA. Federal Select Agent Program: HHS and USDA Select Agents and  
709 Toxins 7CFR Part 331, 9 CFR Part 121, and 42 CFR Part 73. Accessed 09 Dec 2021:  
710 [https://www.selectagents.gov/sat/list.htm?CDC\\_AA\\_refVal=https%3A%2F%2Fwww.sel](https://www.selectagents.gov/sat/list.htm?CDC_AA_refVal=https%3A%2F%2Fwww.selectagents.gov%2FSelectAgentsandToxinsList.html)  
711 [ectagents.gov%2FSelectAgentsandToxinsList.html](https://www.selectagents.gov/sat/list.htm?CDC_AA_refVal=https%3A%2F%2Fwww.selectagents.gov%2FSelectAgentsandToxinsList.html). 2021.

712 4. Towner JS, Khristova ML, Sealy TK, Vincent MJ, Erickson BR, Bawiec DA, et al.  
713 Marburgvirus Genomics and Association with a Large Hemorrhagic Fever Outbreak in  
714 Angola. *Journal of Virology*. 2006;80(13):6497-516. doi: 10.1128/jvi.00069-06.

715 5. Towner JS, Pourrut X, Albariño CG, Nkogue CN, Bird BH, Grard G, et al. Marburg  
716 Virus Infection Detected in a Common African Bat. *PLoS ONE*. 2007;2(8):e764. doi:  
717 10.1371/journal.pone.0000764.

718 6. Amman BR, Carroll SA, Reed ZD, Sealy TK, Balinandi S, Swanepoel R, et al.  
719 Seasonal Pulses of Marburg Virus Circulation in Juvenile *Rousettus aegyptiacus* Bats  
720 Coincide with Periods of Increased Risk of Human Infection. *PLoS Pathogens*.  
721 2012;8(10):e1002877. doi: 10.1371/journal.ppat.1002877.

722 7. WHO. Press Release 09 Aug 2021: West Africa's first-ever case of Marburg virus  
723 disease confirmed in Guinea. Accessed 09 Dec 2021:  
724 [https://worldhealthorganization.cmail19.com/t/ViewEmail/d/85906C6ABA3E08E32540](https://worldhealthorganization.cmail19.com/t/ViewEmail/d/85906C6ABA3E08E32540EF23F30FEDED/84D956050C9556035281BC0AA5ABFD98)  
725 [EF23F30FEDED/84D956050C9556035281BC0AA5ABFD98](https://worldhealthorganization.cmail19.com/t/ViewEmail/d/85906C6ABA3E08E32540EF23F30FEDED/84D956050C9556035281BC0AA5ABFD98). 2021. Epub 09 Aug 2021.

726 8. Amman BR, Bird BH, Bakarr IA, Bangura J, Schuh AJ, Johnny J, et al. Isolation  
727 of Angola-like Marburg virus from Egyptian rousette bats from West Africa. *Nature*  
728 *Communications*. 2020;11(1). doi: 10.1038/s41467-020-14327-8.

729 9. Woolsey C, Geisbert TW. Current state of Ebola virus vaccines: A snapshot. *PLOS*  
730 *Pathogens*. 2021;17(12):e1010078. doi: 10.1371/journal.ppat.1010078.

731 10. Choi MJ, Cossaboom CM, Whitesell AN, Dyal JW, Joyce A, Morgan RL, et al.  
732 Use of Ebola Vaccine: Recommendations of the Advisory Committee on Immunization  
733 Practices, United States, 2020. *MMWR Recommendations and Reports*. 2021;70(1):1-12.  
734 doi: 10.15585/mmwr.rr7001a1.

- 735 11. WHO. Preliminary results on the efficacy of rVSV-ZEBOV-GP Ebola vaccine  
736 using the ring vaccination strategy in the control of an Ebola outbreak in the Democratic  
737 Republic of the Congo: an example of integration of research into epidemic response. 10  
738 April 2019 meeting report. Accessed 04 Nov 21. Available from:  
739 [https://www.who.int/csr/resources/publications/ebola/ebola-ring-vaccination-results-12-](https://www.who.int/csr/resources/publications/ebola/ebola-ring-vaccination-results-12-april-2019.pdf)  
740 [april-2019.pdf](https://www.who.int/csr/resources/publications/ebola/ebola-ring-vaccination-results-12-april-2019.pdf).
- 741 12. Henao-Restrepo AM, Camacho A, Longini IM, Watson CH, Edmunds WJ, Egger  
742 M, et al. Efficacy and effectiveness of an rVSV-vectored vaccine in preventing Ebola virus  
743 disease: final results from the Guinea ring vaccination, open-label, cluster-randomised trial  
744 (Ebola Ça Suffit!). *The Lancet*. 2017;389(10068):505-18. doi: 10.1016/s0140-  
745 6736(16)32621-6.
- 746 13. Woolsey C, Jankeel A, Matassov D, Geisbert JB, Agans KN, Borisevich V, et al.  
747 Immune correlates of postexposure vaccine protection against Marburg virus. *Scientific*  
748 *Reports*. 2020;10(1). doi: 10.1038/s41598-020-59976-3.
- 749 14. Woolsey C, Geisbert JB, Matassov D, Agans KN, Borisevich V, Cross RW, et al.  
750 Postexposure Efficacy of Recombinant Vesicular Stomatitis Virus Vectors Against High  
751 and Low Doses of Marburg Virus Variant Angola in Nonhuman Primates. *The Journal of*  
752 *Infectious Diseases*. 2018;218(suppl\_5):S582-S7. doi: 10.1093/infdis/jiy293.
- 753 15. Geisbert TW, Hensley LE, Geisbert JB, Leung A, Johnson JC, Grolla A, et al.  
754 Postexposure Treatment of Marburg Virus Infection. *Emerging Infectious Diseases*.  
755 2010;16(7):1119-22. doi: 10.3201/eid1607.100159.
- 756 16. Geisbert TW, Feldmann H. Recombinant Vesicular Stomatitis Virus–Based  
757 Vaccines Against Ebola and Marburg Virus Infections. *The Journal of Infectious Diseases*.  
758 2011;204(suppl\_3):S1075-S81. doi: 10.1093/infdis/jir349.
- 759 17. Matassov D, Mire, C. E., Latham, T., Geisbert, J. B., Xu, R., Ota-Setlik, A., Agans,  
760 K. N., Kobs, D. J., Wendling, M., Burnaugh, A., Rudge, T. L., Jr, Sabourin, C. L., Egan,  
761 M. A., Clarke, D. K., Geisbert, T. W., & Eldridge, J. H. . Single-Dose Trivalent  
762 VesiculoVax Vaccine Protects Macaques from Lethal Ebolavirus and Marburgvirus  
763 Challenge. *Journal of virology*. 2018;92(3), e01190-17.
- 764 18. Geisbert TW, Geisbert, J. B., Leung, A., Daddario-DiCaprio, K. M., Hensley, L.  
765 E., Grolla, A., & Feldmann, H. Single-injection vaccine protects nonhuman primates  
766 against infection with marburg virus and three species of ebola virus. *Journal of virology*.  
767 2009;83(14), 7296–7304.
- 768 19. Mire CE, Geisbert JB, Versteeg KM, Mamaeva N, Agans KN, Geisbert TW, et al.  
769 A Single-Vector, Single-Injection Trivalent Filovirus Vaccine: Proof of Concept Study in  
770 Outbred Guinea Pigs. *Journal of Infectious Diseases*. 2015;212(suppl 2):S384-S8. doi:  
771 10.1093/infdis/jiv126.
- 772 20. Daddario-Dicaprio KM, Geisbert TW, Geisbert JB, StröHer U, Hensley LE, Grolla  
773 A, et al. Cross-Protection against Marburg Virus Strains by Using a Live, Attenuated

- 774 Recombinant Vaccine. *Journal of Virology*. 2006;80(19):9659-66. doi: 10.1128/jvi.00959-  
775 06.
- 776 21. Daddario-Dicaprio KM, Geisbert TW, Ströher U, Geisbert JB, Grolla A, Fritz EA,  
777 et al. Postexposure protection against Marburg haemorrhagic fever with recombinant  
778 vesicular stomatitis virus vectors in non-human primates: an efficacy assessment. *The*  
779 *Lancet*. 2006;367(9520):1399-404. doi: 10.1016/s0140-6736(06)68546-2.
- 780 22. Geisbert TW, Strong JE, Feldmann H. Considerations in the Use of Nonhuman  
781 Primate Models of Ebola Virus and Marburg Virus Infection: Table 1. *Journal of Infectious*  
782 *Diseases*. 2015;212(suppl 2):S91-S7. doi: 10.1093/infdis/jiv284.
- 783 23. Mire CE, Geisbert JB, Agans KN, Satterfield BA, Versteeg KM, Fritz EA, et al.  
784 Durability of a Vesicular Stomatitis Virus-Based Marburg Virus Vaccine in Nonhuman  
785 Primates. *PLoS ONE*. 2014;9(4):e94355. doi: 10.1371/journal.pone.0094355.
- 786 24. Matsuno K, Kishida N, Usami K, Igarashi M, Yoshida R, Nakayama E, et al.  
787 Different Potential of C-Type Lectin-Mediated Entry between Marburg Virus Strains.  
788 *Journal of Virology*. 2010;84(10):5140-7. doi: 10.1128/jvi.02021-09.
- 789 25. Cross RW, Fenton KA, Geisbert JB, Ebihara H, Mire CE, Geisbert TW.  
790 Comparison of the Pathogenesis of the Angola and Ravn Strains of Marburg Virus in the  
791 Outbred Guinea Pig Model. *Journal of Infectious Diseases*. 2015;212(suppl 2):S258-S70.  
792 doi: 10.1093/infdis/jiv182.
- 793 26. Geisbert TW, Daddario-DiCaprio KM, Geisbert JB, Young HA, Formenty P, Fritz  
794 EA, et al. Marburg virus Angola infection of rhesus macaques: pathogenesis and treatment  
795 with recombinant nematode anticoagulant protein c2. *J Infect Dis*. 2007;196 Suppl 2(Suppl  
796 2):S372-81. doi: 10.1086/520608. PubMed PMID: 17940973; PubMed Central PMCID:  
797 PMC7110112.
- 798 27. Marzi A JA, Menicucci AR, Callison J, O'Donnell KL, Feldmann F, Pinski AN,  
799 Hanley PW, Messaoudi I. Single Dose of a VSV-Based Vaccine Rapidly Protects  
800 Macaques From Marburg Virus Disease. *Frontiers in immunology*. 2021;12.
- 801 28. Huttner A, Dayer J-A, Yerly S, Combescure C, Auderset F, Desmeules J, et al. The  
802 effect of dose on the safety and immunogenicity of the VSV Ebola candidate vaccine: a  
803 randomised double-blind, placebo-controlled phase 1/2 trial. *The Lancet Infectious*  
804 *Diseases*. 2015;15(10):1156-66. doi: 10.1016/s1473-3099(15)00154-1.
- 805 29. Agnandji ST, Huttner A, Zinser ME, Njuguna P, Dahlke C, Fernandes JF, et al.  
806 Phase 1 Trials of rVSV Ebola Vaccine in Africa and Europe. *New England Journal of*  
807 *Medicine*. 2016;374(17):1647-60. doi: 10.1056/nejmoa1502924.
- 808 30. Clarke DK, Xu R, Matassov D, Latham TE, Ota-Setlik A, Gerardi CS, et al. Safety  
809 and immunogenicity of a highly attenuated rVSVN4CT1-EBOVGPI Ebola virus vaccine:  
810 a randomised, double-blind, placebo-controlled, phase 1 clinical trial. *The Lancet*  
811 *Infectious Diseases*. 2020;20(4):455-66. doi: 10.1016/s1473-3099(19)30614-0.

- 812 31. Wertz GW, Perepelitsa VP, Ball LA. Gene rearrangement attenuates expression  
813 and lethality of a nonsegmented negative strand RNA virus. *Proceedings of the National*  
814 *Academy of Sciences*. 1998;95(7):3501-6. doi: 10.1073/pnas.95.7.3501.
- 815 32. Roberts A, Buonocore L, Price R, Forman J, Rose JK. Attenuated vesicular  
816 stomatitis viruses as vaccine vectors. *Journal of virology*. 1999;73(5):3723-32. doi:  
817 10.1128/JVI.73.5.3723-3732.1999. PubMed PMID: 10196265.
- 818 33. Woolsey C, Borisevich V, Agans KN, Fenton KA, Cross RW, Geisbert TW.  
819 Bundibugyo ebolavirus Survival Is Associated with Early Activation of Adaptive  
820 Immunity and Reduced Myeloid-Derived Suppressor Cell Signaling. *mBio*.  
821 2021;12(4):e0151721. Epub 20210810. doi: 10.1128/mBio.01517-21. PubMed PMID:  
822 34372693; PubMed Central PMCID: PMCPCMC8406165.
- 823 34. Stelzer G, Rosen N, Plaschkes I, Zimmerman S, Twik M, Fishilevich S, et al. The  
824 GeneCards Suite: From Gene Data Mining to Disease Genome Sequence Analyses.  
825 *Current Protocols in Bioinformatics*. 2016;54(1):1.30.1-1..3. doi:  
826 <https://doi.org/10.1002/cpbi.5>.
- 827 35. Geisbert TW, Bailey M, Geisbert JB, Asiedu C, Roederer M, Grazia-Pau M, et al.  
828 Vector choice determines immunogenicity and potency of genetic vaccines against Angola  
829 Marburg virus in nonhuman primates. *J Virol*. 2010;84(19):10386-94. Epub 20100721.  
830 doi: 10.1128/jvi.00594-10. PubMed PMID: 20660192; PubMed Central PMCID:  
831 PMCPCMC2937810.
- 832 36. McElroy AK, Erickson BR, Flietstra TD, Rollin PE, Nichol ST, Towner JS, et al.  
833 Ebola Hemorrhagic Fever: Novel Biomarker Correlates of Clinical Outcome. *Journal of*  
834 *Infectious Diseases*. 2014;210(4):558-66. doi: 10.1093/infdis/jiu088.
- 835 37. Wauquier N, Becquart P, Padilla C, Baize S, Leroy EM. Human Fatal Zaire Ebola  
836 Virus Infection Is Associated with an Aberrant Innate Immunity and with Massive  
837 Lymphocyte Apoptosis. *PLoS Neglected Tropical Diseases*. 2010;4(10):e837. doi:  
838 10.1371/journal.pntd.0000837.
- 839 38. Ruibal P, Oestereich L, Lütke A, Becker-Ziaja B, Wozniak DM, Kerber R, et al.  
840 Unique human immune signature of Ebola virus disease in Guinea. *Nature*.  
841 2016;533(7601):100-4. doi: 10.1038/nature17949.
- 842 39. Ries M, Reynolds MR, Bashkueva K, Crosno K, Capuano S, III, Prall TM, et al.  
843 KIR3DL01 upregulation on gut natural killer cells in response to SIV infection of KIR-  
844 and MHC class I-defined rhesus macaques. *PLOS Pathogens*. 2017;13(7):e1006506. doi:  
845 10.1371/journal.ppat.1006506.
- 846 40. Webster RL, Johnson RP. Delineation of multiple subpopulations of natural killer  
847 cells in rhesus macaques. *Immunology*. 2005;115(2):206-14. doi: 10.1111/j.1365-  
848 2567.2005.02147.x.



- 849 41. Mire CE, Matassov D, Geisbert JB, Latham TE, Agans KN, Xu R, et al. Single-  
850 dose attenuated Vesiculovax vaccines protect primates against Ebola Makona virus.  
851 Nature. 2015;520(7549):688-91. doi: 10.1038/nature14428.
- 852 42. Matassov D, Marzi A, Latham T, Xu R, Ota-Setlik A, Feldmann F, et al.  
853 Vaccination With a Highly Attenuated Recombinant Vesicular Stomatitis Virus Vector  
854 Protects Against Challenge With a Lethal Dose of Ebola Virus. Journal of Infectious  
855 Diseases. 2015;212(suppl 2):S443-S51. doi: 10.1093/infdis/jiv316.
- 856 43. Pejowski D, De Rham C, Martinez-Murillo P, Santoro F, Auderset F, Medaglini D,  
857 et al. Rapid dose-dependent Natural Killer (NK) cell modulation and cytokine responses  
858 following human rVSV-ZEBOV Ebolavirus vaccination. npj Vaccines. 2020;5(1). doi:  
859 10.1038/s41541-020-0179-4.
- 860 44. Rechten A, Richert L, Lorenzo H, Martrus G, Hejblum B, Dahlke C, et al. Systems  
861 Vaccinology Identifies an Early Innate Immune Signature as a Correlate of Antibody  
862 Responses to the Ebola Vaccine rVSV-ZEBOV. Cell Reports. 2017;20(9):2251-61. doi:  
863 <https://doi.org/10.1016/j.celrep.2017.08.023>.
- 864 45. Medaglini D, Santoro F, Siegrist C-A. Correlates of vaccine-induced protective  
865 immunity against Ebola virus disease. Seminars in Immunology. 2018;39:65-72. doi:  
866 <https://doi.org/10.1016/j.smin.2018.07.003>.
- 867 46. Stoermer KA, Morrison TE. Complement and viral pathogenesis. Virology.  
868 2011;411(2):362-73. Epub 2011/02/02. doi: 10.1016/j.virol.2010.12.045. PubMed PMID:  
869 21292294.
- 870 47. Kotliar D, Lin AE, Logue J, Hughes TK, Khoury NM, Raju SS, et al. Single-Cell  
871 Profiling of Ebola Virus Disease In Vivo Reveals Viral and Host Dynamics. Cell.  
872 2020;183(5):1383-401.e19. doi: 10.1016/j.cell.2020.10.002.
- 873 48. Mohamadzadeh M, Chen L, Schmaljohn AL. How Ebola and Marburg viruses  
874 battle the immune system. Nature Reviews Immunology. 2007;7(7):556-67. doi:  
875 10.1038/nri2098.
- 876 49. Williams KJ, Qiu X, Fernando L, Jones SM, Alimonti JB. VSVΔG/EBOV GP-  
877 induced innate protection enhances natural killer cell activity to increase survival in a lethal  
878 mouse adapted Ebola virus infection. Viral immunology. 2015;28(1):51-61.
- 879 50. Wagstaffe HR, Clutterbuck EA, Bockstal V, Stoop JN, Luhn K, Douoguih M, et al.  
880 Antibody-Dependent Natural Killer Cell Activation After Ebola Vaccination. The Journal  
881 of Infectious Diseases. 2021;223(7):1171-82. doi: 10.1093/infdis/jiz657.
- 882 51. Dahlke C, Kasonta R, Lunemann S, Krähling V, Zinser ME, Biedenkopf N, et al.  
883 Dose-dependent T-cell Dynamics and Cytokine Cascade Following rVSV-ZEBOV  
884 Immunization. EBioMedicine. 2017;19:107-18. doi: 10.1016/j.ebiom.2017.03.045.

- 885 52. Farooq F, Beck K, Paolino KM, Phillips R, Waters NC, Regules JA, et al.  
886 Circulating follicular T helper cells and cytokine profile in humans following vaccination  
887 with the rVSV-ZEBOV Ebola vaccine. *Scientific Reports*. 2016;6(1):27944. doi:  
888 10.1038/srep27944.
- 889 53. Medaglini D, Santoro F, Siegrist CA. Correlates of vaccine-induced protective  
890 immunity against Ebola virus disease. *Semin Immunol*. 2018;39:65-72. Epub 20180721.  
891 doi: 10.1016/j.smim.2018.07.003. PubMed PMID: 30041831.
- 892 54. Lazarevic V, Glimcher LH, Lord GM. T-bet: a bridge between innate and adaptive  
893 immunity. *Nature Reviews Immunology*. 2013;13(11):777-89. doi: 10.1038/nri3536.
- 894 55. Iwata S, Mikami Y, Sun H-W, Brooks SR, Jankovic D, Hirahara K, et al. The  
895 Transcription Factor T-bet Limits Amplification of Type I IFN Transcriptome and  
896 Circuitry in T Helper 1 Cells. *Immunity*. 2017;46(6):983-91.e4. doi:  
897 10.1016/j.immuni.2017.05.005.
- 898 56. Connor JH, Yen J, Caballero IS, Garamszegi S, Malhotra S, Lin K, et al.  
899 Transcriptional Profiling of the Immune Response to Marburg Virus Infection. *J Virol*.  
900 2015;89(19):9865-74. Epub 20150722. doi: 10.1128/jvi.01142-15. PubMed PMID:  
901 26202234; PubMed Central PMCID: PMC4577901.

902

## 903 Supporting Information Captions

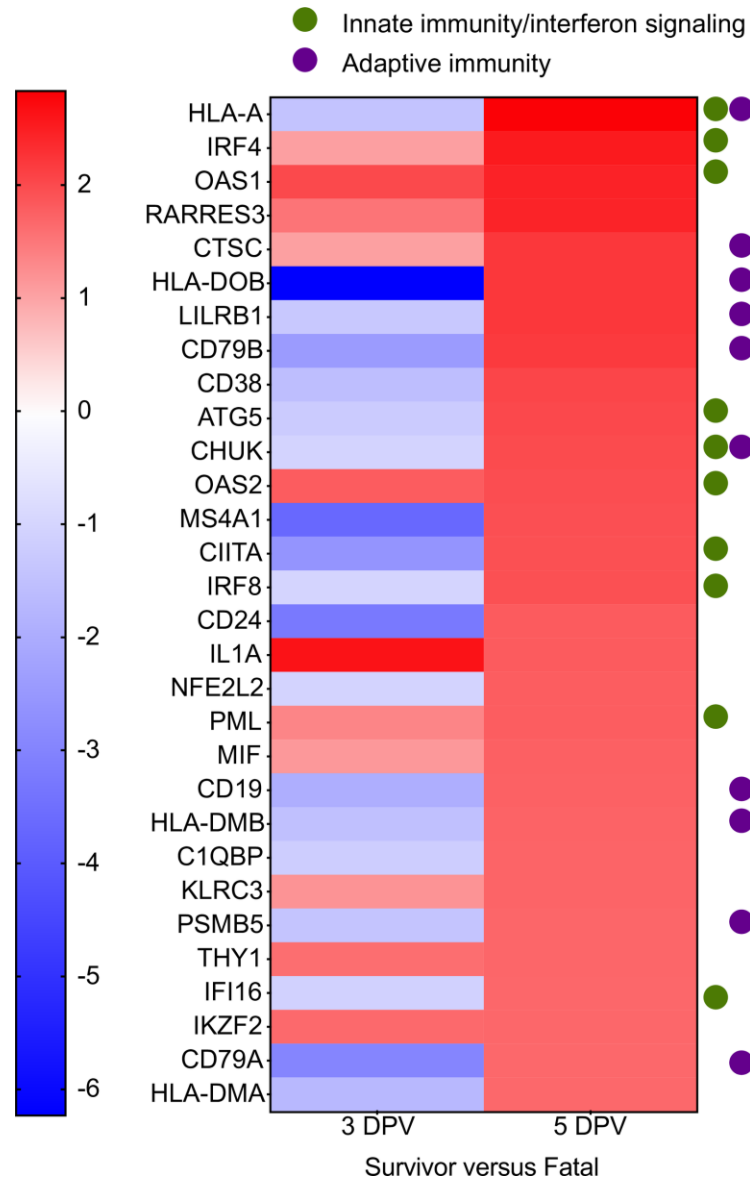

904

905 **Fig S1. The topmost upregulated transcripts in Vesiculovax-vaccinated survivors on**

906 **the day of challenge.** Heatmap of the most upregulated mRNAs in survivor versus fatal

907 subjects at five days post rVSV-N4CT1-MARV-GP vaccination (DPV) compared to 3

908 DPV. As only a single survivor exists in the 3 DPV group and a single fatal case exists in

909 the 5 DPV group, statistical analysis was not performed. Red indicates high expression;

910 blue indicates low expression; white indicates no difference in expression. Dots indicate

911 whether specific mRNA is involved in adaptive immunity or innate immunity/interferon  
 912 signaling.

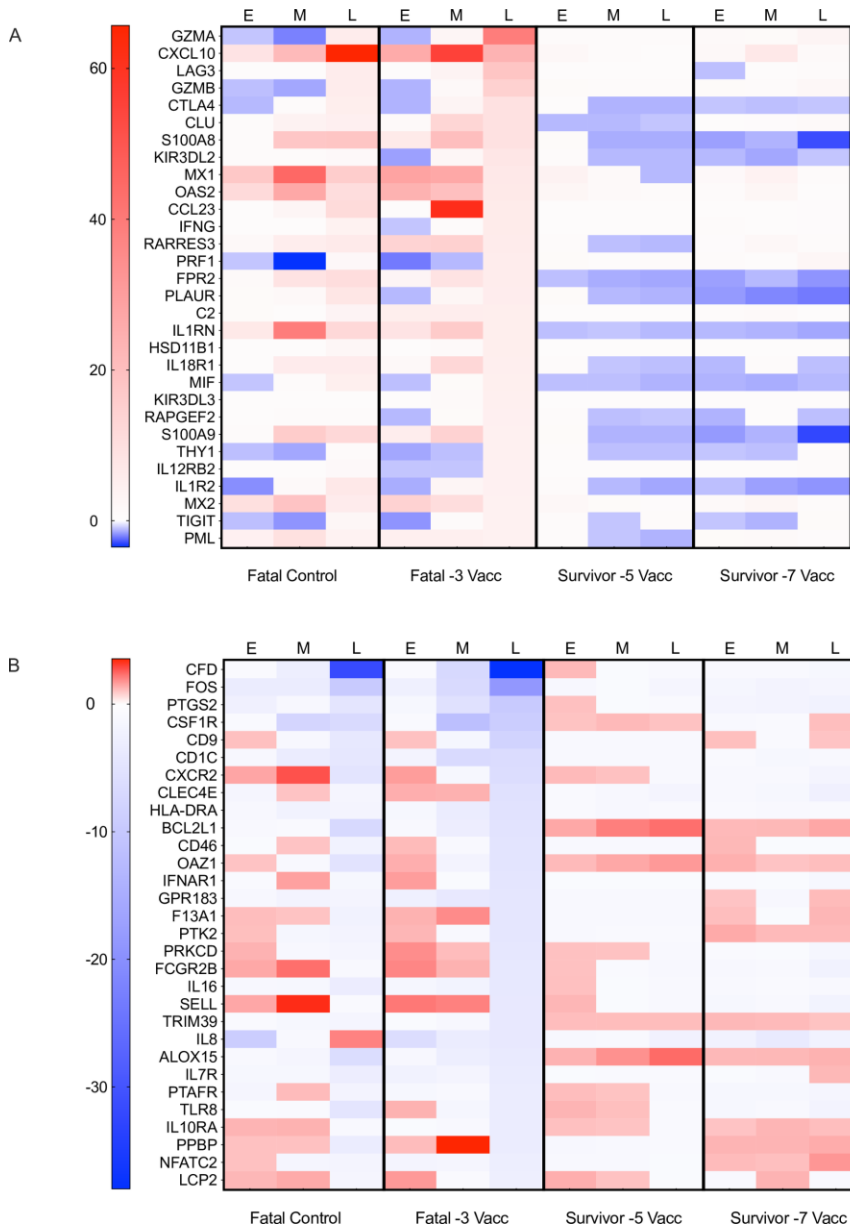

913  
 914 **Fig S2. The topmost upregulated and downregulated transcripts in fatal subjects**  
 915 **vaccinated with Vesiculovax vaccines.**  
 916 Heatmap of the most upregulated mRNAs in fatal subjects at five days post rVSV-N4CT1-  
 917 MARV-GP vaccination (DPV) compared to 3 DPV. As only a single survivor exists in the

918 3 DPV group and a single fatal case exists in the 5 DPV group, statistical analysis was not  
919 performed. Red indicates high expression; blue indicates low expression; white indicates  
920 no difference in expression. Dots indicate whether specific mRNA is involved in adaptive  
921 immunity or innate immunity/interferon signaling. Abbreviations: Vacc, vaccinated; E,  
922 early disease (3 DPI); M, mid disease (6 DPI); L, late disease (10 DPI or terminal  
923 timepoint).

924

925

926

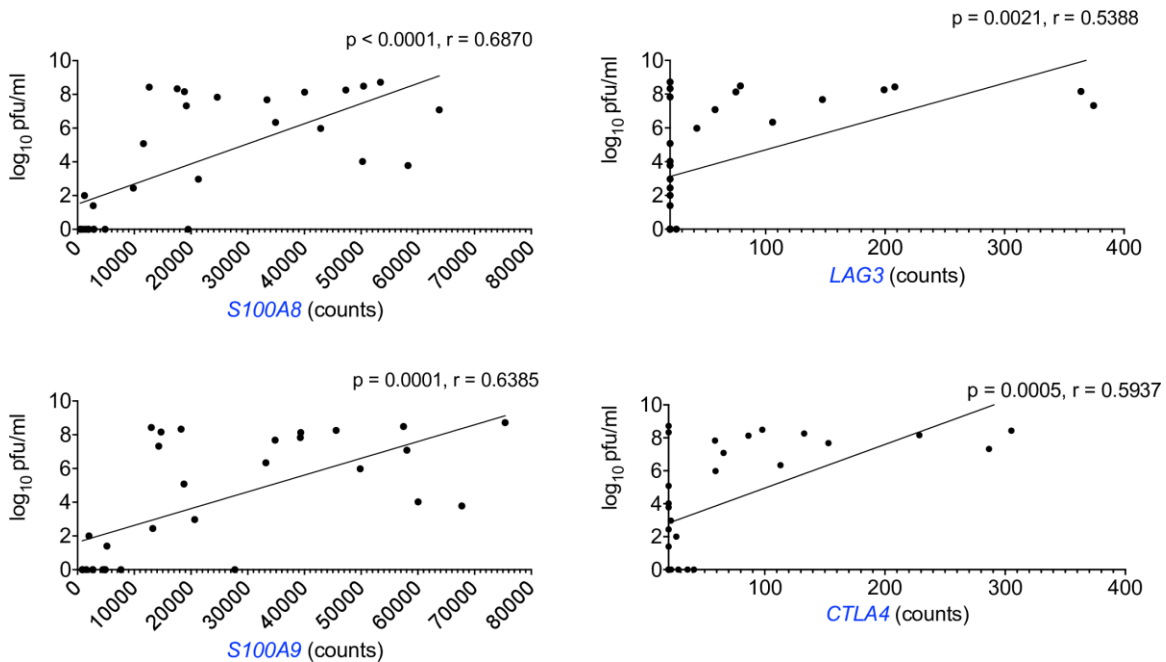

927

928 **Fig S3. Transcriptional correlates associated with lethal outcome in Vesiculovax-**  
929 **vaccinated macaques exposed to MARV-Angola.**

930 Pearson correlation plots for calprotectin (S100A8 and S100A9) and immune checkpoint  
931 (LAG3 and CTLA4) transcripts (Benjamini-Hochberg false discovery rate (FDR)  
932 corrected p-value less than 0.05).

| Animal ID (sex) weight                 | Group (Day of Vaccination) | RT-qPCR Titer (LOG <sub>10</sub> copies/ml)* | Viremia Titer (LOG <sub>10</sub> PFU/ml)* | Clinical Signs**†                                                                                                                                                                                                                                                                                                                           | Final Outcome       |
|----------------------------------------|----------------------------|----------------------------------------------|-------------------------------------------|---------------------------------------------------------------------------------------------------------------------------------------------------------------------------------------------------------------------------------------------------------------------------------------------------------------------------------------------|---------------------|
| Control 1<br>181171<br>(M) 2.86<br>kg  | -7                         | 7.25 (3), 11.88<br>(6), 11.71 (8)            | 5.08 (3),<br>8.72 (6),<br>8.43 (8)        | Anorexia (7,8), petechial rash (8), dyspnea (8), lymphopenia (3), lymphocytosis + (8), monocytosis + (6) +++ (8), neutropenia (8), neutrophilia + (0,3,6), eosinopenia (0,3), eosinophilia +++ (8), basopenia (3), basophilia + (8), BUN ++ (8), CRE +++ (8), ALT +++ (6,8), AST +++ (6,8), ALP ++ (6,8), GGT +++ (6,8), CRP increase (6,8) | Euthanized 8<br>DPI |
| Survivor 1<br>181120<br>(M) 3.36<br>kg | -7                         | N.D.                                         | N.D.                                      | Monocytopenia (0,14), neutrophilia ++ (0,14), eosinopenia (21), basopenia (21)                                                                                                                                                                                                                                                              | Survived            |
| Survivor 2<br>Q1501008<br>(F) 3.88 kg  | -7                         | N.D.                                         | N.D.                                      | Monocytopenia (14)                                                                                                                                                                                                                                                                                                                          | Survived            |
| Survivor 3<br>142866<br>(M) 7.60<br>kg | -7                         | N.D.                                         | N.D.                                      | Leukopenia (0,6,10,14,21,28), lymphocytosis + (10), monocytopenia (14,28), neutropenia (0,3,6,10,14,21,28), eosinopenia (0,6,10,14,21), basopenia (0,3,6,10,14,21,28)                                                                                                                                                                       | Survived            |
| Survivor 4<br>131332 (F)<br>3.94 kg    | -7                         | N.D.                                         | N.D.                                      | Anorexia (5), neutropenia (28), eosinopenia (6), basopenia (6), ALT + (0,3) ++ (10,21,28) +++ (14), CRP increase (6)                                                                                                                                                                                                                        | Survived            |
| Survivor 5<br>151022 (F)<br>3.20 kg    | -7                         | N.D.                                         | N.D.                                      | Neutropenia (0,10), eosinopenia (0,21), eosinophilia + (28), basopenia (0,21)                                                                                                                                                                                                                                                               | Survived            |

933

934 **S1 Table. Clinical findings in MARV-exposed cynomolgus macaques immunized with**

935 **Vesiculovax vaccine 7 days prior to challenge.**

936 Macaques were immunized with a vector control (black; n=1) or rVSV-N4CT1-MARV-

937 GP vaccine at -7 DPI (blue; n=5). \*Day after MARV challenge is in parentheses up to the

938 28 DPI study endpoint. †Fever is defined as a temperature greater than 2.5 °F above

939 baseline, at least 1.5 °F above baseline and ≥ 103.5 °F, or 1.1 °F above baseline and ≥

940 104°F. Leukopenia, thrombocytopenia, and lymphopenia are defined by a > 40% drop in

941 numbers of leukocytes, platelets, and lymphocytes, respectively. Leukocytosis,

942 monocytosis, and granulocytosis are defined as a ≥ two-fold increase in leukocytes,

943 monocytes, and granulocytes, respectively. Crosses indicate increases in liver enzymes

944 (ALT, AST, ALP, GGT) or renal function test values (BUN, CRE): 2- to 3-fold increase,

945 +; >3- up to 5-fold increase, ++; >5-fold increase, +++. Abbreviations: M, male; F, female;  
 946 kg, kilogram; PFU, plaque-forming units; MARV, Marburg virus; BUN, blood urea  
 947 nitrogen; CRE, creatinine; ALT, alanine aminotransferase; AST, aspartate  
 948 aminotransferase; ALP, alkaline phosphatase; GGT, gamma-glutamyltransferase; CRP, c-  
 949 reactive protein; DPI, days post infection.

950

| Animal ID (sex) weight                | Group (Day of Vaccination) | RT-qPCR Titer (LOG <sub>10</sub> copies/ml)* | Viremia Titer (LOG <sub>10</sub> PFU/ml)* | Clinical Signs*†                                                                                                                                                                                                                                                                                                                                                                                                   | Final Outcome    |
|---------------------------------------|----------------------------|----------------------------------------------|-------------------------------------------|--------------------------------------------------------------------------------------------------------------------------------------------------------------------------------------------------------------------------------------------------------------------------------------------------------------------------------------------------------------------------------------------------------------------|------------------|
| Control 2<br>1306064<br>(F) 3.44 kg   | -5                         | 10.64 (6),<br>11.45 (8)                      | 7.83 (6),<br>7.68 (8)                     | Fever (6), anorexia (8), severe depression (8), petechial rash (7,8), dyspnea (8), bleeding at venipuncture site (8), leukocytosis ++ (8), lymphocytosis + (8), monocytosis + (3) +++ (8), neutropenia (0), neutrophilia + (6) +++ (8), eosinopenia (0), eosinophilia + (8), basophilia ++ (8), BUN ++ (8), CRE + (0,3,6) +++ (8), ALT +++ (6,8), AST +++ (6,8), ALP + (6) ++ (8), GGT +++ (8), CRP increase (6,8) | Euthanized 8 DPI |
| Survivor 6<br>Y1606047<br>(M) 3.50 kg | -5                         | N.D.                                         | N.D.                                      | Monocytosis + (0,14), neutrophilia + (0), eosinopenia (14,28), basopenia (28)                                                                                                                                                                                                                                                                                                                                      | Survived         |
| Survivor 7<br>1309106<br>(F) 3.20 kg  | -5                         | N.D.                                         | N.D.                                      | Monocytosis +++ (6), neutrophilia + (6), eosinopenia (0), basopenia (0)                                                                                                                                                                                                                                                                                                                                            | Survived         |
| Survivor 8<br>1607197<br>(M) 3.66 kg  | -5                         | N.D.                                         | N.D.                                      | Monocytosis + (3,6) ++ (0), eosinopenia (6,10,21,28), eosinophilia + (3), basopenia (6,10,21)                                                                                                                                                                                                                                                                                                                      | Survived         |
| Fatal 1<br>1405226<br>(F) 3.44 kg     | -5                         | 7.56 (6), 11.88 (9)                          | 4.02 (6), 8.26 (9)                        | Fever (3,6), anorexia (6,7,8,9), mild depression (3,6), severe depression (9), uncoordinated movement (8,9), petechial rash (9), thrombocytopenia (6), lymphopenia (6), monocytopenia (0), neutrophilia + (3,9), eosinopenia (3,6), basopenia (6), BUN ++ (9), CRE +++ (9), ALT +++ (9), AST +++ (9), ALP ++ (6) +++ (9), GGT +++ (9), amylase +++ (9), CRP increase (3,6,9)                                       | Euthanized 9 DPI |
| Survivor 9<br>Y1512011<br>(M) 3.32 kg | -5                         | N.D.                                         | N.D.                                      | Leukocytosis + (3), monocytosis + (3,6,14), neutropenia (28), neutrophilia + (3), eosinopenia (6,21,28)                                                                                                                                                                                                                                                                                                            | Survived         |

951

952 **S2 Table. Clinical findings in MARV-exposed cynomolgus macaques immunized with**  
 953 **Vesiculovax vaccine 5 days prior to challenge.**

954 Macaques were immunized with a vector control (black; n=1) or rVSV-N4CT1-MARV-  
955 GP vaccine at -5 DPI (brown; n=5). \*Day after MARV challenge is in parentheses up to  
956 the 28 DPI study endpoint. †Fever is defined as a temperature greater than 2.5 °F above  
957 baseline, at least 1.5 °F above baseline and  $\geq 103.5$  °F, or 1.1 °F above baseline and  $\geq$   
958 104°F. Leukopenia, thrombocytopenia, and lymphopenia are defined by a > 40% drop in  
959 numbers of leukocytes, platelets, and lymphocytes, respectively. Leukocytosis,  
960 monocytosis, and granulocytosis are defined as a  $\geq$  two-fold increase in leukocytes,  
961 monocytes, and granulocytes, respectively. Crosses indicate increases in liver enzymes  
962 (ALT, AST, ALP, GGT) or renal function test values (BUN, CRE): 2- to 3-fold increase,  
963 +; >3- up to 5-fold increase, ++; >5-fold increase, +++. Abbreviations: M, male; F, female;  
964 kg, kilogram; PFU, plaque-forming units; MARV, Marburg virus; BUN, blood urea  
965 nitrogen; CRE, creatinine; ALT, alanine aminotransferase; AST, aspartate  
966 aminotransferase; ALP, alkaline phosphatase; GGT, gamma-glutamyltransferase; CRP, c-  
967 reactive protein; DPI, days post infection.



968

| Animal ID (sex) weight                  | Group (Day of Vaccination) | RT-qPCR Titer (LOG <sub>10</sub> copies/ml)* | Viremia Titer (LOG <sub>10</sub> PFU/ml)* | Clinical Signs*†                                                                                                                                                                                                                                                                                                                                                                                                                                                           | Final Outcome       |
|-----------------------------------------|----------------------------|----------------------------------------------|-------------------------------------------|----------------------------------------------------------------------------------------------------------------------------------------------------------------------------------------------------------------------------------------------------------------------------------------------------------------------------------------------------------------------------------------------------------------------------------------------------------------------------|---------------------|
| Control 3<br>1508374<br>(F) 2.96 kg     | -3                         | 11.70 (6),<br>11.09 (9)                      | 2.00 (3),<br>8.33 (6),<br>7.08 (9)        | Anorexia (8), mild depression (8,9), petechial rash (6,7,8,9), diarrhea (8,9), leukocytosis ++ (9), thrombocytopenia (9), lymphopenia (6), lymphocytosis ++ (9), monocytosis + (3) +++ (9), neutrophilia + (9), eosinopenia (0,3,6), eosinophilia +++ (9), basopenia (0,6), basophilia ++ (9), ALT +++ (6,9), AST +++ (6,9), ALP + (9) ++ (6), GGT ++ (6,9), CRP increase (6)                                                                                              | Euthanized<br>9 DPI |
| Fatal 2<br>150820<br>(M) 6.80 kg        | -3                         | 9.52 (6)                                     | 1.40 (3),<br>5.98 (6)                     | Fever (6), anorexia (6), petechial rash (6), bleeding nares (6), thrombocytopenia (6), CRE ++ (6), ALT +++ (6), AST +++ (6), ALP ++ (6), CRP increase (6)                                                                                                                                                                                                                                                                                                                  | Euthanized<br>6 DPI |
| Fatal 3<br>181131<br>(M) 3.00 kg        | -3                         | 5.58 (3), 10.18<br>(6)                       | 2.97 (3),<br>6.34 (6)                     | Fever (3,6), anorexia (5,6), moderate depression (6), petechial rash (6), rectal bleeding (6), bleeding at venipuncture sites (6), thrombocytopenia (6), lymphopenia (3), monocytopenia (0,3), neutrophilia + (3), eosinopenia (0,3,6), basopenia (0,3,6), BUN + (6), CRE + (6), ALT +++ (6), AST +++ (6), GGT ++ (6), CRP increase (3,6)                                                                                                                                  | Euthanized<br>6 DPI |
| Fatal 4<br>140130 (F)<br>2.84 kg        | -3                         | 6.00 (3), 11.36<br>(6), 9.23 (7)             | 3.78 (3),<br>8.13 (6),<br>8.16 (7)        | Anorexia (5,6,7), severe depression (7), mild petechial rash (6,7), rectal bleeding (7), leukocytosis + (7), lymphopenia (0,3), lymphocytosis + (7), monocytosis + (7), neutrophilia + (3,7), eosinopenia (0,3,6), basopenia (3,6), basophilia + (7), ALT +++ (6), AST +++ (6), ALP ++ (6), GGT ++ (6), CRP increase (3,6)                                                                                                                                                 | Euthanized<br>7 DPI |
| Survivor<br>10<br>150966<br>(M) 6.70 kg | -3                         | 6.76 (6), 7.90<br>(10), 5.48 (14)            | 2.89 (3),<br>3.34 (6),<br>4.26 (10)       | Anorexia (6,7,8,9,10), petechial rash (9,10,11,12), leukocytosis + (3,28) +++ (14), lymphopenia (6), lymphocytosis + (21) ++ (14), monocytosis + (3,21) ++ (14,28), neutrophilia + (6,10,28) ++ (3) +++ (14), eosinopenia (6), eosinophilia + (14) ++ (28), basopenia (6), basophilia + (3,28) ++ (14), BUN ++ (10), CRE + (10), ALT + (21) +++ (10,14), AST + (6) ++ (14) +++ (10), ALP + (6) ++ (28) +++ (10,14,21), GGT + (28) ++ (21) +++ (10,14), CRP increase (6,10) | Survived            |
| Fatal 5<br>Q1502038<br>(F) 3.24 kg      | -3                         | 5.05 (3), 10.22<br>(6), 8.62 (7)             | 2.44 (3),<br>8.49 (6),<br>7.32 (7)        | Anorexia (6,7), petechial rash (6,7), dyspnea (7), thrombocytopenia (6,7), lymphopenia (3,6), neutrophilia + (3,7), eosinophilia + (3) ++ (7), BUN + (6) +++ (7), CRE ++ (6), ALT +++ (6,7), AST +++ (6,7), ALP +++ (6,7), GGT +++ (6,7), amylase + (7), CRP increase (3,6,7)                                                                                                                                                                                              | Euthanized<br>7 DPI |

969

970 **S3 Table. Clinical findings in MARV-exposed cynomolgus macaques immunized with**

971 **Vesiculovax vaccine 3 days prior to challenge.**

972 Macaques were immunized with a vector control (black; n=1) or rVSV-N4CT1-MARV-

973 GP vaccine at -3DPI (red; n=5). \*Day after MARV challenge is in parentheses up to the

974 28 DPI study endpoint. †Fever is defined as a temperature greater than 2.5 °F above  
975 baseline, at least 1.5 °F above baseline and  $\geq$  103.5 °F, or 1.1 °F above baseline and  $\geq$   
976 104°F. Leukopenia, thrombocytopenia, and lymphopenia are defined by a > 40% drop in  
977 numbers of leukocytes, platelets, and lymphocytes, respectively. Leukocytosis,  
978 monocytosis, and granulocytosis are defined as a  $\geq$  two-fold increase in leukocytes,  
979 monocytes, and granulocytes, respectively. Crosses indicate increases in liver enzymes  
980 (ALT, AST, ALP, GGT) or renal function test values (BUN, CRE): 2- to 3-fold increase,  
981 +; >3- up to 5-fold increase, ++; >5-fold increase, +++. Abbreviations: M, male; F, female;  
982 kg, kilogram; PFU, plaque-forming units; MARV, Marburg virus; BUN, blood urea  
983 nitrogen; CRE, creatinine; ALT, alanine aminotransferase; AST, aspartate  
984 aminotransferase; ALP, alkaline phosphatase; GGT, gamma-glutamyltransferase; CRP, c-  
985 reactive protein; DPI, days post infection.

986

## 987 **Funding**

988 This study was supported in part by the Department of Health and Human Services,  
989 National Institutes of Health, grant number U19AI142785 to TWG. Operations support of  
990 the Galveston National Laboratory was supported by NIAID/NIH grant UC7AI094660.

991

## 992 **Availability of data and materials**

993 The datasets used and/or analyzed during the current study are available from the  
994 corresponding author upon request.

995

## 996 **Author contributions**

997 TWG, MAE, JHE, and DM conceived and designed the study. CG, TEL, and DM designed  
998 the vaccine vectors and did preparative work. DJD, JBG, and TWG performed the  
999 challenge experiments. CW, RWC, DJD, JBG, and TWG performed animal procedures  
1000 and clinical observations. VB and KNA performed the clinical pathology assays. VB  
1001 performed the plaque assays. KNA performed the PCR assays. CW performed the  
1002 transcriptomic assays and bioinformatics. CW performed the ELISAs. KAF performed the  
1003 necropsies and gross pathology analysis. All authors analyzed the data. CW wrote the  
1004 paper. RWC, TWG, and DM edited the paper. All authors had access to the data and  
1005 approved the final version of the manuscript.
